# Supplementary material
Source: PubMed Central journal article supplement (PMC3032285)
Supplement: suppdata.pdf [file suppdata.pdf]

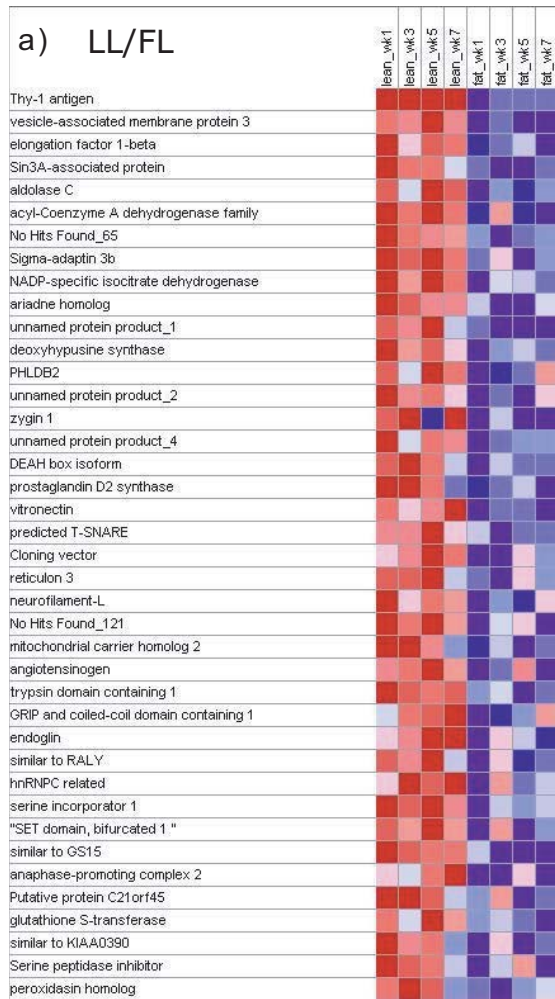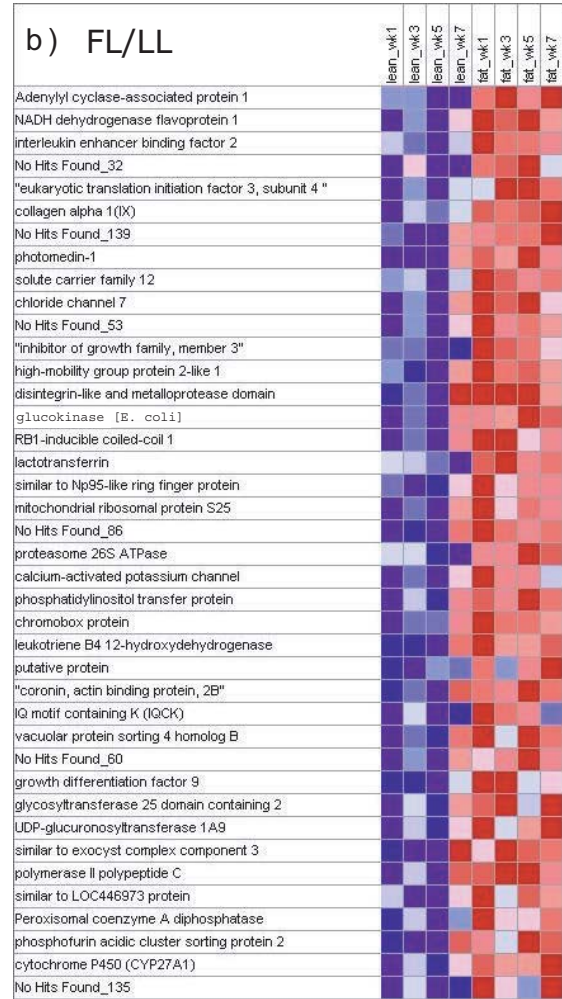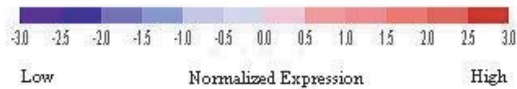

Supplemental Figure 1. Hypothalamic expression patterns that correlate with either the fat or lean phenotype. a) 40 genes up-regulated in LL relative to FL. b) 40 genes up-regulated in the FL relative to LL. All genes are differentially expressed between lines ( $P < .05$ ) and ranking is calculated based on the difference of the means for each line scaled by the sum of the standard deviations  $(x_1 - x_2) / (x_1 + x_2) / 2$ . Genes in red represent high expression levels and genes in blue represent low expression levels.

Supplemental Table 1. Oligonucleotide primers used for qRT-PCR.

| <b>GENE</b>     | <b>Sense primer</b>            | <b>Antisense primer</b>        |
|-----------------|--------------------------------|--------------------------------|
| <i>CYTB</i>     | 5'TTCACATCGGACGAGGCCTAT3'      | 5'CACAAAGGCGGTGGCTATGA3'       |
| <i>EEF1A</i>    | 5'GTGTGTGGAGAGCTTCTCCAGTAC3'   | 5'CGCTCTTCTTCCACGTTCTTG3'      |
| <i>PGAMI</i>    | 5'CACCCCTTCTTCAGCACCAT3'       | 5'ATGGTGTCTTCAGGCTCTCA3'       |
| <i>NAPB</i>     | 5'AAGCCACGAGGAGCAGAAC3'        | 5'GCGAAGCAACATGGTTGTGA3'       |
| <i>TPH1</i>     | 5'AATCCGTATACTCAGAGTGTGCAGAT3' | 5'AGGGCATCGCTGACAATGTC3'       |
| <i>ENO2</i>     | 5'AGATGACCCAAGCCGCTACA3'       | 5'GGTCAAAGGGATCCTCAATGG3'      |
| <i>GPI</i>      | 5'GCCCAACCAATTCCATCATG3'       | 5'CCAGACAACCCCTGAACAA3'        |
| <i>CEBPZ</i>    | 5'GGATGAAAATGCTGGGTCCAA3'      | 5'CGCCGCTCTAATTCCCCTTG3'       |
| <i>DPYSL2</i>   | 5'TCTCTGCCAAGACCCACAACA'       | 5'CACGATCTTCCCTGGCTGAT3'       |
| <i>TMEM120A</i> | 5'ACAACGCCGTCACCCTATTC3'       | 5'GTTCCCCAGGAAGAGGACGAA3'      |
| <i>GHRHR</i>    | 5'CCTTGGCATTTCGGCTTTATTTAG3'   | 5'TCAGGAAACAGTAGAGGAGTGCTACA3' |
| <i>PITRMI</i>   | 5'TCAGATGAAATGAAGCAGTCA3'      | 5'GTGCTCTTCCCAACTGCAAGA3'      |
| <i>GAPDH</i>    | 5'AAGGAGTGAGCCAAGCACACA3'      | 5'TCACTGCAGGATGCAGAACTG3'      |
| <i>ACTB</i>     | 5'CCCAAAGCCAACAGAGAGAAG3'      | 5'ACCATCACCAGAGTCCATCAC3'      |

Supplemental Table 2

| cDNA Clone ID   | Human Protein ID | HUGO Gene Symbol | Highest BlastX Hit                                                                                       | LL Wk1 mean | LL Wk3 mean | LL Wk5 mean | LL Wk7 mean | FL Wk1 mean | FL Wk3 mean | FL Wk5 mean | FL Wk7 mean | P-value (Line) | P-value (Age) | P-value (Line X Age) |
|-----------------|------------------|------------------|----------------------------------------------------------------------------------------------------------|-------------|-------------|-------------|-------------|-------------|-------------|-------------|-------------|----------------|---------------|----------------------|
| ppp1n.pk010.e8  |                  |                  | No Hits Found                                                                                            | 0.561       | 0.248       | 0.814       | 0.535       | -0.484      | 0.252       | 0.529       | 0.238       | 0.032          | 0.103         | 0.207                |
| ppp1c.pk010.i21 | NP_001377        | DPYSL2           | DIPYROPYRIMIDINASE RELATED PROTEIN-2 (DRP-2)                                                             | 0.069       | 0.032       | 0.384       | 0.366       | -1.004      | 0.345       | 0.359       | 0.186       | 0.113          | 0.027         | 0.027                |
| ppp1n.pk010.i21 | NP_116226        |                  | No Hits Found                                                                                            | 0.482       | 0.254       | 0.712       | 0.356       | -0.481      | 0.187       | 0.630       | 0.121       | 0.040          | 0.048         | 0.175                |
| ppp1n.pk012.k20 | NP_004862        | GOSR1            | golgi SNAP receptor complex member 1 [Homo sapiens]                                                      | 0.180       | -0.131      | 0.263       | 0.124       | -0.761      | -0.126      | -0.097      | -0.181      | 0.019          | 0.404         | 0.188                |
| ppp1c.pk001.m22 | NP_821133        | TUBB4            | tubulin, beta 5 [Mus musculus]                                                                           | 0.108       | -0.011      | 0.141       | -0.015      | -0.785      | 0.178       | 0.073       | -0.129      | 0.064          | 0.036         | 0.014                |
| ppp1n.pk008.d3  | NP_001684        |                  | adenosinetriphosphatase (EC 3.6.1.3) B chain - chicken                                                   | 0.278       | 0.095       | 0.421       | 0.434       | -0.614      | 0.422       | 0.307       | 0.364       | 0.063          | 0.001         | 0.001                |
| ppp2n.pk003.c7  | NP_003359        |                  | Ubiquitin carboxyl-terminal hydrolase 1 (Ubiquitin thiolesterase 1)                                      | -0.163      | -0.158      | 0.052       | 0.265       | -1.054      | 0.113       | 0.142       | 0.033       | 0.164          | 0.002         | 0.025                |
| ppp1n.pk010.f8  | NP_689477        |                  | Unknown (protein for MGC:20695) [Homo sapiens]                                                           | 0.588       | 0.063       | 0.697       | 0.424       | -0.275      | 0.432       | 0.617       | 0.297       | 0.203          | 0.079         | 0.026                |
| pnfb.pk0002.b12 |                  |                  | No Hits Found                                                                                            | 0.363       | 0.680       | 0.718       | 0.615       | -0.467      | 0.177       | 0.570       | -0.808      | 0.000          | 0.005         | 0.076                |
| ppp1c.pk001.b7  | NP_006077        | TUBB3            | Unknown (protein for IMAGE:2823044) [Homo sapiens]                                                       | 0.205       | 0.123       | 0.216       | 0.079       | -0.608      | 0.088       | 0.174       | -0.135      | 0.020          | 0.082         | 0.055                |
| ppp2n.pk010.a21 | NP_065735        |                  | Supported by Human EST H08032.1 (NID.g872854)                                                            | 0.069       | -0.077      | 0.022       | 0.048       | -0.730      | 0.045       | 0.042       | -0.093      | 0.061          | 0.070         | 0.016                |
| ppp1n.pk012.p19 | NP_115667        | SGIP1            | unnamed protein product [Mus musculus]                                                                   | -0.012      | 0.023       | 0.075       | 0.257       | -0.802      | 0.274       | 0.202       | 0.127       | 0.078          | 0.000         | 0.000                |
| ppp1n.pk001.i10 | NP_057707        | FAM49B           | similar to hypothetical protein DKFZp566A1524 [Homo sapiens]                                             | 0.517       | 0.374       | 0.486       | 0.528       | -0.244      | 0.301       | 0.528       | 0.069       | 0.026          | 0.161         | 0.074                |
| ppp1n.pk006.h4  | NP_001949        | EEF1A2           | eukaryotic translation elongation factor 1 alpha 2 [Homo sapiens]                                        | 0.153       | -0.005      | 0.163       | 0.184       | -0.606      | 0.103       | 0.026       | -0.126      | 0.022          | 0.202         | 0.071                |
| ppp1c.pk001.d14 | XP_375905        |                  | extensin - <i>Volvox carterii</i> (fragment)                                                             | 0.560       | 0.363       | 0.586       | 0.372       | -0.171      | 0.351       | 0.329       | 0.272       | 0.044          | 0.588         | 0.217                |
| ppp1n.pk007.n5  | NP_055112        |                  | HSC90 protein [Mus musculus]                                                                             | 0.333       | 0.318       | 0.327       | 0.609       | -0.381      | 0.604       | 0.730       | 0.065       | 0.229          | 0.011         | 0.003                |
| ppp1n.pk014.n20 | NP_004334        | CALR             | calreticulin [Mus musculus]                                                                              | 0.487       | 0.261       | 0.202       | 0.394       | -0.222      | 0.404       | 0.280       | 0.186       | 0.076          | 0.514         | 0.021                |
| ppm2n.pk014.b17 | NP_002857        | RAB3A            | RAB3A, member RAS oncogene family [Mus musculus]                                                         | 0.459       | 0.392       | 0.425       | 0.200       | -0.247      | 0.293       | 0.241       | 0.021       | 0.042          | 0.415         | 0.453                |
| ppp1n.pk011.f12 | NP_002816        | PTN              | pleiotrophin                                                                                             | 0.353       | 0.065       | 0.419       | 0.178       | -0.352      | 0.127       | 0.034       | -0.043      | 0.037          | 0.743         | 0.238                |
| ppp1n.pk010.e24 | NP_001393        |                  | ELONGATION FACTOR 1-ALPHA 1 (EF-1-ALPHA-1)                                                               | 0.037       | 0.107       | 0.097       | 0.026       | -0.667      | -0.049      | 0.069       | -0.386      | 0.035          | 0.211         | 0.382                |
| pgl1n.pk003.d1  | NP_000567        |                  | interleukin-1beta [Gallus gallus]                                                                        | 0.337       | 0.148       | 0.137       | 0.145       | -0.330      | 0.125       | 0.399       | 0.288       | 0.411          | 0.260         | 0.026                |
| ppp1n.pk004.m13 | NP_005554        | STMN1            | stathmin [Gallus gallus]                                                                                 | 0.331       | -0.029      | -0.069      | -0.178      | -0.326      | -0.103      | -0.263      | -0.306      | 0.026          | 0.437         | 0.256                |
| ppp1n.pk005.i22 | NP_002789        | PSMB6            | Similar to proteasome (prosome, macropain) subunit, beta type 6                                          | 0.110       | -0.003      | 0.130       | 0.182       | -0.547      | 0.279       | 0.169       | 0.062       | 0.236          | 0.026         | 0.011                |
| ppp1n.pk005.b24 | NP_542117        | APIGBP1          | gamma-synergin [Rattus norvegicus]                                                                       | -0.066      | -0.071      | 0.111       | 0.189       | -0.723      | 0.091       | 0.105       | 0.062       | 0.068          | 0.000         | 0.011                |
| pgf2c.pk001.p22 | NP_078994        |                  | unnamed protein product [Homo sapiens]                                                                   | 0.169       | 0.004       | 0.283       | 0.151       | -0.486      | 0.211       | 0.163       | 0.039       | 0.099          | 0.073         | 0.040                |
| ppp1n.pk001.n7  | NP_065198        |                  | NDRF family member 4 [Homo sapiens]                                                                      | -0.166      | -0.171      | 0.187       | 0.297       | -0.819      | 0.058       | 0.265       | 0.162       | 0.254          | 0.000         | 0.038                |
| ppp1n.pk004.m4  | NP_008993        | PQB1             | hepatocyte growth factor activator inhibitor precursor serum deprivation response protein [Homo sapiens] | 0.159       | -0.008      | 0.242       | 0.242       | -0.307      | 0.356       | 0.244       | 0.104       | 0.032          | 0.299         | 0.364                |
| ppm1c.pk003.a20 | NP_008993        | PWP1             | nuclear phosphoprotein similar to <i>S. cerevisiae</i> PWP1                                              | 0.134       | -0.072      | 0.316       | 0.141       | -0.512      | -0.328      | 0.203       | -0.053      | 0.037          | 0.080         | 0.492                |
| ppp1n.pk012.i21 | NP_001966        | ENO2             | Gamma enolase (Neural enolase)                                                                           | 0.140       | 0.082       | 0.262       | 0.214       | -0.498      | 0.114       | 0.192       | -0.013      | 0.048          | 0.082         | 0.159                |
| ppp1n.pk006.n22 | NP_004786        |                  | Klotho secreted isoform [Macaca fascicularis]                                                            | 0.046       | -0.032      | 0.135       | 0.158       | -0.587      | -0.057      | 0.071       | -0.052      | 0.028          | 0.049         | 0.130                |
| pgf1n.pk011.o18 | NP_002733        |                  | protein kinase C, mu [Mus musculus]                                                                      | 0.437       | 0.340       | 0.478       | 0.632       | -0.193      | 0.565       | 0.577       | -0.072      | 0.030          | 0.068         | 0.009                |
| ppm1c.pk002.d7  | NP_055399        |                  | ERO1-like (S. cerevisiae) [Mus musculus]                                                                 | 0.153       | 0.080       | 0.244       | 0.378       | -0.477      | 0.354       | 0.407       | 0.199       | 0.209          | 0.000         | 0.001                |
| pgf2n.pk006.p11 | NP_004147        | PPP2CB           | Serine/threonine protein phosphatase 2A, catalytic subunit, alpha                                        | 0.315       | 0.375       | 0.452       | 0.358       | -0.314      | 0.299       | 0.381       | 0.188       | 0.046          | 0.083         | 0.256                |
| ppp1c.pk003.a11 | NP_006169        |                  | vesicular fusion protein NSF - Chinese hamster (fragment)                                                | 0.210       | 0.039       | 0.383       | 0.345       | -0.414      | 0.296       | 0.379       | 0.270       | 0.262          | 0.011         | 0.032                |
| pgf2c.pk001.a11 | NP_958816        |                  | beta-amyloid precursor protein 751 isoform [Gallus gallus]                                               | 0.267       | 0.183       | 0.484       | 0.421       | -0.358      | 0.349       | 0.409       | 0.267       | 0.064          | 0.004         | 0.031                |
| ppp1n.pk013.j1  | NP_071344        | FUS              | mitochondrial ribosomal protein L17 [Mus musculus]                                                       | 0.513       | 0.082       | 0.665       | 0.337       | -0.110      | 0.349       | 0.353       | 0.250       | 0.045          | 0.305         | 0.197                |
| ppp1n.pk009.i7  | NP_004951        |                  | fusion, derived from t(12;16) malignant liposarcoma [Homo sapiens]                                       | 0.111       | 0.095       | 0.142       | 0.189       | -0.507      | 0.109       | 0.193       | -0.046      | 0.036          | 0.043         | 0.056                |
| ppp2n.pk007.f6  | NP_068807        | SPHK1            | sphingosine kinase 1 [Mus musculus]                                                                      | 0.176       | 0.057       | 0.404       | 0.278       | -0.441      | 0.209       | 0.272       | 0.437       | 0.239          | 0.011         | 0.031                |
| ppp2n.pk008.k1  | NP_003701        |                  | hepatocyte growth factor activator inhibitor precursor serum deprivation response protein [Homo sapiens] | 0.448       | 0.367       | 0.296       | 0.242       | -0.166      | 0.063       | 0.226       | -0.174      | 0.012          | 0.304         | 0.364                |
| pgf2c.pk001.n24 | NP_004648        |                  | No Hits Found                                                                                            | 0.311       | 0.386       | 0.436       | 0.216       | -0.302      | 0.349       | 0.401       | 0.209       | 0.038          | 0.006         | 0.031                |
| ppm2n.pk004.c7  |                  |                  | No Hits Found                                                                                            | 0.190       | 0.049       | 0.330       | 0.238       | -0.419      | -0.020      | 0.231       | 0.093       | 0.021          | 0.030         | 0.156                |
| pgf1n.pk006.d19 | NP_001737        | CANX             | calnexin [Homo sapiens]                                                                                  | 0.237       | -0.004      | 0.413       | -0.400      | -0.367      | 0.044       | 0.261       | 0.395       | 0.500          | 0.059         | 0.018                |
| ppp1n.pk007.h11 | NP_036611        | YWHAG            | tyrosine 3-monooxygenase/tryptophan 5-monooxygenase                                                      | 0.397       | 0.193       | 0.455       | 0.185       | -0.205      | 0.143       | 0.138       | 0.155       | 0.029          | 0.619         | 0.222                |
| ppp1n.pk013.i12 | NP_071363        | NAPB             | N-ethylmaleimide-sensitive factor attachment protein, beta                                               | 0.269       | 0.227       | 0.494       | 0.462       | -0.334      | 0.235       | 0.465       | 0.488       | 0.079          | 0.001         | 0.020                |
| ppp1n.pk013.f6  | NP_036380        |                  | Selenide, water dikinase 2 [Selenophosphate synthetase 2]                                                | 0.030       | 0.031       | 0.039       | 0.296       | -0.570      | 0.270       | 0.243       | 0.121       | 0.252          | 0.000         | 0.001                |
| ppp1n.pk008.m24 | NP_001139        | ANK2             | ankyrin 2, isoform 1 [Homo sapiens]                                                                      | 0.501       | 0.291       | 0.487       | 0.374       | -0.097      | 0.440       | 0.365       | 0.162       | 0.013          | 0.164         | 0.010                |
| ppp1n.pk004.i24 | NP_002620        | PGAM1            | similar to phosphoglycerate mutase B chain - rat                                                         | 0.010       | -0.049      | 0.159       | 0.105       | -0.582      | -0.040      | -0.110      | -0.099      | 0.005          | 0.058         | 0.118                |
| ppp1n.pk005.c24 | XP_372887        |                  | cytochrome b [Gallus gallus]                                                                             | 0.267       | 0.015       | 0.362       | 0.330       | -0.320      | 0.075       | -0.058      | -0.061      | 0.032          | 0.683         | 0.186                |
| ppp1n.pk004.c21 | NP_631961        | FUS              | RNA-binding protein FUS (Pigpen protein)                                                                 | 0.152       | 0.097       | 0.132       | 0.148       | -0.430      | 0.044       | 0.089       | -0.069      | 0.024          | 0.292         | 0.189                |
| pgl1n.pk013.n12 |                  |                  | POL-like                                                                                                 | 0.311       | 0.336       | 0.367       | 0.540       | -0.271      | 0.440       | 0.482       | 0.202       | 0.046          | 0.006         | 0.013                |
| pgf2c.pk001.p6  | NP_000081        | COL3A1           | alpha 1(I) type III collagen [Homo sapiens]                                                              | 0.188       | 0.036       | 0.282       | 0.223       | -0.301      | 0.082       | 0.100       | 0.037       | 0.037          | 0.455         | 0.448                |
| ppf1n.pk009.d13 | NP_000964        |                  | ribosomal protein L8 [Homo sapiens]                                                                      | 0.395       | 0.122       | 0.095       | 0.063       | -0.182      | 0.235       | 0.229       | -0.034      | 0.232          | 0.509         | 0.041                |
| pgl1n.pk014.h3  | NP_006331        | BAIAP2           | Fas-ligand associated factor 3 [Homo sapiens]                                                            | 0.159       | 0.016       | 0.015       | 0.055       | -0.417      | 0.013       | 0.039       | -0.098      | 0.022          | 0.435         | 0.030                |
| ppp1n.pk007.n4  | NP_570711        |                  | multiple endocrine neoplasia 1 [Rattus norvegicus]                                                       | 0.458       | 0.321       | 0.427       | 0.509       | -0.113      | 0.469       | 0.448       | 0.281       | 0.088          | 0.166         | 0.041                |
| ppp1n.pk010.e12 | NP_958833        |                  | reticulon 3 [Homo sapiens]                                                                               | 0.386       | 0.520       | 0.567       | 0.201       | -0.172      | 0.189       | 0.748       | -0.528      | 0.039          | 0.030         | 0.283                |
| ppp1n.pk011.e23 | NP_056530        | PLA2G3           | group III secreted phospholipase A2 [Homo sapiens]                                                       | 0.226       | -0.080      | -0.164      | -0.155      | -0.331      | -0.162      | 0.150       | -0.192      | 0.315          | 0.581         | 0.019                |
| ppp1n.pk004.h16 | NP_009037        | UBL3             | ubiquitin-like 3 [Homo sapiens]                                                                          | 0.006       | -0.116      | 0.119       | 0.098       | -0.547      | 0.124       | 0.177       | 0.025       | 0.030          | 0.006         | 0.010                |
| ppf1n.pk004.c4  | NP_001686        | ATP6V1C1         | Vacuolar ATP synthase subunit C (V-ATPase C subunit)                                                     | 0.365       | 0.246       | 0.410       | 0.445       | -0.188      | 0.394       | 0.161       | 0.484       | 0.088          | 0.049         | 0.045                |
| ppf1n.pk007.n4  | NP_000987        | RPL35A           | 60S RIBOSOMAL PROTEIN L35A (L32)                                                                         | 0.154       | 0.003       | 0.186       | -0.164      | -0.397      | 0.126       | 0.212       | 0.020       | 0.578          | 0.121         | 0.039                |
| ppp1n.pk003.d3  | NP_008819        | CALM1            | calmodulin 2 (phosphorylase kinase, delta) [Homo sapiens]                                                | 0.267       | 0.055       | 0.234       | 0.145       | -0.283      | 0.127       | 0.101       | 0.120       | 0.050          | 0.423         | 0.043                |
| ppp1c.pk002.i8  |                  |                  | hypothetical protein [Rhodospseudomonas palustris]                                                       | 0.215       | -0.001      | 0.093       | 0.079       | -0.334      | 0.081       | 0.090       | 0.065       | 0.098          | 0.433         | 0.015                |
| pgf1n.pk006.m9  | NP_000179        | HK1              | hexokinase 1 [Gallus gallus]                                                                             | 0.013       | -0.039      | 0.241       | 0.301       | -0.532      | 0.130       | 0.185       | 0.111       | 0.077          | 0.002         | 0.046                |
| ppp1n.pk012.f18 | NP_064709        | CIAPIN1          | Unknown gene product [Homo sapiens]                                                                      | 0.379       | 0.224       | 0.251       | 0.321       | -0.165      | 0.240       | 0.200       | 0.261       | 0.027          | 0.345         | 0.068                |
| ppp1n.pk008.c18 | NP_004037        | ATP5A1           | ATP synthase alpha subunit [Gallus gallus]                                                               | 0.458       | 0.231       | 0.374       | 0.410       | -0.075      | 0.171       | 0.275       | 0.341       | 0.019          | 0.022         | 0.022                |
| ppp1n.pk001.n2  | NP_000166        | GPI              | phosphogluconase isomerase [Boiga kraepelini]                                                            | 0.212       | 0.085       | 0.311       | 0.317       | -0.327      | 0.357       | 0.275       | 0.075       | 0.207          | 0.082         | 0.039                |
| ppp1n.pk006.i9  | NP_065185        | ATP8B2           | Unknown (protein for IMAGE:4111596) [Homo sapiens]                                                       | 0.217       | 0.038       | 0.257       | 0.058       | -0.320      | 0.028       | 0.016       | 0.006       | 0.028</        |               |                      |

|                 |           |           |                                                                    |        |        |        |        |        |        |        |        |       |       |       |
|-----------------|-----------|-----------|--------------------------------------------------------------------|--------|--------|--------|--------|--------|--------|--------|--------|-------|-------|-------|
| pgp1n.pk014.o13 |           | GAPDH     | Glyceraldehyde 3-phosphate dehydrogenase (GAPDH)                   | 0.463  | 0.248  | 0.389  | 0.185  | 0.082  | 0.275  | 0.076  | 0.117  | 0.019 | 0.652 | 0.175 |
| pgp1n.pk009.m9  | NP_004772 | VAMP3     | vesicle-associated membrane protein 3 [Mus musculus]               | 0.456  | 0.433  | 0.615  | 0.401  | 0.075  | 0.159  | 0.101  | 0.101  | 0.027 | 0.966 | 0.951 |
| pgp1n.pk002.o14 | NP_733779 | SKP1A     | S-phase kinase-associated protein 1A isoform b [Homo sapiens]      | 0.228  | 0.186  | 0.424  | 0.294  | -0.152 | 0.225  | 0.243  | 0.213  | 0.042 | 0.051 | 0.235 |
| pgp1n.pk011.o19 | NP_000133 |           | Tyrosine kinase receptor CEK2 precursor                            | 0.228  | 0.016  | 0.081  | 0.096  | -0.145 | 0.035  | -0.027 | -0.057 | 0.016 | 0.994 | 0.136 |
| pgp2n.pk002.o14 | NP_003818 | NAPA      | N-ethylmaleimide sensitive fusion protein attachment protein alpha | 0.079  | -0.021 | 0.047  | 0.074  | -0.289 | -0.029 | -0.026 | -0.006 | 0.033 | 0.377 | 0.160 |
| pgp1n.pk012.i21 | NP_002626 |           | phosphate carrier protein precursor, mitochondrial, splice form B  | 0.067  | 0.060  | 0.121  | 0.130  | -0.297 | 0.082  | 0.084  | 0.151  | 0.089 | 0.010 | 0.041 |
| pgp1n.pk006.p11 | NP_055031 |           | similar to inositol 1,3,4-triphosphate 5/6 kinase [Mus musculus]   | 0.364  | 0.364  | 0.364  | 0.415  | 0.270  | 0.263  | 0.263  | 0.153  | 0.283 | 0.042 | 0.042 |
| pgp1n.pk010.c13 | NP_003783 |           | endothelial differentiation-related factor 1 isoform alpha         | 0.129  | 0.138  | 0.074  | 0.078  | -0.231 | -0.099 | 0.203  | -0.350 | 0.012 | 0.136 | 0.114 |
| pgp1n.pk011.d13 |           |           | No Hits Found                                                      | 0.309  | 0.207  | 0.272  | 0.276  | -0.051 | 0.287  | 0.311  | 0.199  | 0.107 | 0.092 | 0.009 |
| pgp1c.pk003.k3  | NP_996737 |           | RNA binding/signal transduction protein Oki-2 [Gallus gallus]      | 0.201  | 0.228  | 0.325  | 0.265  | -0.151 | 0.344  | 0.366  | 0.274  | 0.403 | 0.003 | 0.032 |
| pgm2n.pk002.p11 |           |           | No Hits Found                                                      | 0.301  | 0.201  | 0.317  | 0.254  | -0.046 | 0.176  | 0.359  | 0.420  | 0.404 | 0.012 | 0.007 |
| pgp2n.pk003.k15 | NP_005008 | PCYT1A    | CTP:phosphocholine cytidyltransferase                              | -0.092 | -0.016 | -0.101 | 0.347  | -0.437 | 0.187  | 0.126  | -0.088 | 0.287 | 0.016 | 0.016 |
| pgp1n.pk013.m13 | NP_115798 |           | unnamed protein product [Mus musculus]                             | 0.151  | 0.322  | 0.292  | 0.066  | -0.189 | 0.155  | 0.084  | 0.136  | 0.049 | 0.119 | 0.333 |
| pgp1n.pk004.n20 | NP_443183 | DNTTIP1   | RIKEN cDNA 6430706C13 [Mus musculus]                               | 0.167  | 0.201  | 0.100  | 0.097  | -0.170 | 0.007  | 0.186  | -0.155 | 0.035 | 0.338 | 0.278 |
| pgp2n.pk004.p14 | NP_149015 |           | Piccolo protein (Aczonin)                                          | 0.191  | 0.096  | 0.145  | 0.102  | -0.145 | 0.208  | 0.176  | 0.083  | 0.300 | 0.233 | 0.029 |
| pgf2c.pk001.f22 | NP_065164 |           | unnamed protein product [Mus musculus]                             | 0.189  | 0.244  | 0.155  | 0.063  | -0.146 | 0.207  | 0.061  | 0.022  | 0.013 | 0.023 | 0.107 |
| pgp1n.pk002.o19 | NP_714543 | GSTA1     | GLUTATHIONE S-TRANSFERASE (CLASS-ALPHA)                            | 0.314  | 0.085  | 0.435  | 0.175  | -0.020 | 0.041  | -0.030 | -0.154 | 0.010 | 0.562 | 0.552 |
| pgp1n.pk006.e3  | NP_112604 |           | heterogeneous nuclear ribonucleoprotein C (C1/C2)                  | -0.107 | -0.278 | -0.094 | 0.330  | -0.436 | -0.046 | 0.090  | -0.044 | 0.785 | 0.017 | 0.023 |
| pgp1n.pk014.m11 | NP_001921 | DHPS      | deoxythymine synthase isoform a [Homo sapiens]                     | 0.444  | 0.327  | 0.400  | 0.260  | 0.115  | 0.193  | 0.225  | 0.175  | 0.031 | 0.901 | 0.770 |
| pgf1n.pk013.a5  | NP_068832 | TMSB10    | Thymosin beta                                                      | 0.509  | 0.205  | 0.228  | 0.186  | 0.183  | -0.038 | -0.091 | -0.342 | 0.016 | 0.086 | 0.931 |
| pgf1n.pk006.i24 | NP_005608 | RPS14     | ribosomal protein S14 [Homo sapiens]                               | 0.092  | 0.327  | -0.238 | 0.214  | -0.233 | -0.038 | -0.017 | -0.064 | 0.039 | 0.111 | 0.080 |
| pgp2n.pk003.o4  |           |           | No Hits Found                                                      | 0.405  | 0.100  | 0.171  | 0.011  | 0.086  | 0.013  | -0.039 | -0.023 | 0.027 | 0.078 | 0.459 |
| pgf1n.pk011.b23 | NP_006232 | PPP1R2    | unnamed protein product [Mus musculus]                             | 0.001  | -0.097 | 0.026  | 0.019  | -0.317 | 0.122  | 0.201  | 0.010  | 0.753 | 0.011 | 0.006 |
| pgp1n.pk013.o5  | NP_000996 |           | ribosomal protein S3 (AA 1-243) [Rattus rattus]                    | 0.280  | 0.116  | 0.102  | -0.104 | -0.037 | 0.086  | -0.051 | 0.022  | 0.073 | 0.110 | 0.029 |
| pgp1n.pk002.p13 |           |           | No Hits Found                                                      | 0.171  | 0.177  | 0.173  | 0.169  | -0.142 | 0.080  | 0.076  | 0.063  | 0.031 | 0.648 | 0.665 |
| pgp1n.pk003.o24 | NP_009096 |           | No Hits Found                                                      | 0.254  | 0.141  | 0.172  | 0.076  | -0.057 | 0.065  | 0.123  | 0.032  | 0.021 | 0.620 | 0.178 |
| pgp1n.pk004.e22 | NP_005552 | LAMP1     | LEP100 protein precursor - chicken                                 | 0.076  | 0.043  | 0.144  | 0.165  | -0.234 | 0.194  | 0.153  | 0.111  | 0.263 | 0.004 | 0.011 |
| pgp2n.pk005.k21 | NP_006279 | THY1      | Thy-1 membrane glycoprotein precursor (Thy-1 antigen)              | 0.100  | 0.101  | 0.093  | 0.105  | -0.207 | -0.124 | -0.117 | -0.119 | 0.000 | 0.895 | 0.890 |
| pgf2c.pk001.h2  | NP_002037 | GAPDH     | Glyceraldehyde 3-phosphate dehydrogenase (GAPDH)                   | 0.245  | 0.195  | 0.224  | 0.023  | -0.058 | 0.110  | 0.213  | -0.102 | 0.031 | 0.532 | 0.568 |
| pgp1c.pk003.f13 | NP_060563 |           | hypothetical protein FLJ10439 [Homo sapiens]                       | -0.210 | -0.377 | -0.401 | 0.121  | -0.513 | 0.900  | 0.127  | -0.091 | 0.007 | 0.009 | 0.001 |
| pgp1c.pk001.p2  | NP_001633 | APLP2     | Amyloid-like protein 2 precursor (Sperm membrane protein YWK-II)   | 0.127  | 0.126  | 0.220  | 0.162  | -0.174 | 0.046  | 0.090  | 0.036  | 0.008 | 0.171 | 0.522 |
| pgp1c.pk003.o5  | NP_067295 | SARS      | Seryl-tRNA synthetase (Serine-tRNA ligase) (SeRS)                  | 0.245  | 0.105  | 0.057  | 0.413  | -0.255 | 0.267  | 0.377  | 0.171  | 0.043 | 0.043 | 0.043 |
| pgf1n.pk010.i11 | XP_375261 |           | NONHISTONE CHROMOSOMAL PROTEIN HMG-14A                             | 0.322  | 0.094  | 0.119  | 0.049  | 0.027  | 0.158  | 0.052  | 0.035  | 0.149 | 0.271 | 0.048 |
| pgf1n.pk005.e17 | NP_006591 |           | nuclear distribution gene C homolog (Aspergillus) [Mus musculus]   | 0.117  | 0.058  | 0.134  | 0.175  | -0.178 | 0.206  | 0.196  | 0.081  | 0.444 | 0.086 | 0.045 |
| pgp1n.pk013.e7  | NP_056415 |           | Unknown (protein for IMAGE:3484538) [Mus musculus]                 | 0.169  | 0.201  | 0.443  | 0.581  | -0.125 | 0.384  | 0.298  | 0.449  | 0.089 | 0.000 | 0.032 |
| pgm2n.pk010.m18 |           |           | No Hits Found                                                      | 0.222  | 0.095  | 0.248  | 0.198  | -0.071 | -0.023 | 0.007  | 0.127  | 0.016 | 0.554 | 0.588 |
| pgf1n.pk002.a12 | NP_112190 | CDT1      | putative CDT1 protein [Xenopus laevis]                             | -0.104 | -0.034 | -0.060 | 0.263  | -0.396 | 0.329  | 0.156  | -0.220 | 0.607 | 0.050 | 0.012 |
| pgf1n.pk012.k4  | NP_036522 |           | No Hits Found                                                      | 0.163  | 0.059  | 0.027  | 0.004  | -0.123 | -0.249 | -0.183 | -0.136 | 0.023 | 0.836 | 0.925 |
| pgp1n.pk007.j8  |           |           | No Hits Found                                                      | 0.255  | 0.119  | 0.180  | 0.279  | -0.029 | 0.329  | 0.294  | -0.018 | 0.301 | 0.318 | 0.017 |
| pgp1n.pk003.j1  | NP_004729 | VAPB      | VAMP (vesicle-associated membrane protein)-associated protein B    | 0.182  | 0.080  | 0.163  | 0.138  | -0.102 | 0.108  | 0.076  | 0.021  | 0.007 | 0.547 | 0.066 |
| pgm2n.pk002.f22 | NP_003465 | ADAM12    | ADAM 12 [Coturnix coturnix]                                        | 0.211  | 0.147  | 0.208  | 0.245  | -0.071 | 0.229  | 0.183  | 0.094  | 0.017 | 0.080 | 0.013 |
| pgf1n.pk002.a14 | NP_057103 | LUCL2     | similar to CGI-74 protein [Homo sapiens]                           | -0.032 | 0.035  | -0.002 | 0.336  | -0.313 | 0.446  | 0.307  | -0.166 | 0.891 | 0.056 | 0.016 |
| pgm2n.pk013.o3  | NP_036307 | FBX03     | F-box only protein 3                                               | 0.163  | 0.115  | 0.155  | 0.170  | -0.113 | 0.146  | 0.042  | 0.018  | 0.027 | 0.587 | 0.285 |
| pgp2n.pk007.c3  | NP_007295 |           | vesicle associated protein [Rattus norvegicus]                     | 0.271  | 0.074  | 0.310  | 0.325  | 0.012  | 0.309  | 0.286  | 0.024  | 0.158 | 0.024 | 0.099 |
| pgf1n.pk006.i9  | NP_055038 |           | nuclear transcription factor Y, gamma [Homo sapiens]               | 0.009  | 0.042  | 0.057  | 0.113  | -0.267 | 0.128  | 0.077  | -0.147 | 0.046 | 0.036 | 0.043 |
| pgp2n.pk006.g22 | NP_005820 | AP352     | unnamed protein product [Mus musculus]                             | 0.022  | -0.003 | 0.042  | -0.034 | -0.250 | -0.114 | -0.378 | -0.233 | 0.020 | 0.864 | 0.679 |
| pgp1c.pk002.b23 |           | ATP5A1    | ATP synthase alpha subunit [Gallus gallus]                         | 0.111  | 0.082  | 0.024  | 0.017  | -0.160 | 0.038  | -0.105 | 0.016  | 0.027 | 0.297 | 0.198 |
| pgf2n.pk001.g21 |           | RAB11FIP4 | similar to Eferin [Homo sapiens]                                   | 0.067  | 0.054  | 0.094  | 0.125  | -0.196 | 0.197  | 0.163  | 0.111  | 0.706 | 0.013 | 0.021 |
| pgf1n.pk003.a5  | NP_112186 | ACSBG2    | hepatolectin (Homo sapiens) PRD-NY3 [Homo sapiens]                 | 0.238  | 0.038  | 0.197  | 0.029  | -0.024 | -0.010 | 0.040  | -0.037 | 0.039 | 0.377 | 0.605 |
| pgf1n.pk003.l21 | NP_001143 |           | solute carrier family 25, member 5 [Homo sapiens]                  | 0.154  | 0.011  | 0.029  | 0.073  | -0.109 | -0.021 | -0.030 | -0.154 | 0.036 | 0.916 | 0.501 |
| pgf2n.pk005.g9  |           | KIAA0247  | No Hits Found                                                      | 0.213  | 0.228  | 0.152  | 0.119  | -0.048 | 0.215  | 0.158  | -0.056 | 0.046 | 0.063 | 0.227 |
| pgm2n.pk003.i17 |           |           | No Hits Found                                                      | 0.352  | 0.410  | 0.414  | 0.365  | 0.092  | 0.371  | 0.272  | 0.202  | 0.021 | 0.266 | 0.665 |
| pgf1n.pk001.h12 | NP_000629 |           | vitronectin [Gallus gallus]                                        | 0.508  | 0.417  | 0.470  | 0.624  | 0.249  | 0.306  | 0.310  | 0.245  | 0.037 | 0.962 | 0.800 |
| pgf1n.pk002.m19 | NP_056109 |           | KIAA0898 protein [Homo sapiens]                                    | 0.014  | 0.132  | 0.024  | 0.151  | -0.243 | 0.041  | 0.037  | 0.031  | 0.039 | 0.048 | 0.310 |
| pgm2n.pk011.p17 |           |           | Unknown [Gallus gallus]                                            | -0.023 | -0.109 | -0.073 | 0.104  | -0.279 | -0.027 | -0.023 | -0.091 | 0.078 | 0.121 | 0.024 |
| pgp1n.pk007.b4  | NP_001485 | Rib-CDP   | Rib-CDP p-issocoumarin inhibitor [Gallus gallus]                   | 0.126  | 0.104  | 0.107  | 0.232  | -0.127 | 0.298  | 0.201  | 0.223  | 0.023 | 0.039 | 0.023 |
| pgp1n.pk012.j20 | NP_004323 | BPHL      | No Hits Found                                                      | 0.126  | 0.099  | 0.082  | 0.058  | 0.006  | 0.088  | 0.108  | 0.004  | 0.045 | 0.268 | 0.045 |
| pgp2n.pk005.i19 | XP_291128 | RBM26     | Similar to cationic T-cell lymphoma tumor antigen se70-2           | 0.140  | 0.088  | 0.088  | 0.102  | -0.112 | 0.160  | 0.133  | 0.077  | 0.293 | 0.190 | 0.022 |
| pgp1n.pk002.n3  | NP_002559 |           | poly(A) binding protein, cytoplasmic 1 [Rattus norvegicus]         | 0.208  | 0.181  | 0.244  | 0.154  | -0.041 | 0.214  | 0.126  | 0.126  | 0.024 | 0.156 | 0.072 |
| pgm2n.pk004.e5  | NP_005287 | GPR23     | unnamed protein product [Mus musculus]                             | 0.278  | 0.244  | 0.297  | 0.233  | 0.030  | 0.257  | 0.139  | 0.117  | 0.044 | 0.683 | 0.519 |
| pgp1n.pk011.a10 | NP_004059 | AP2M1     | agCP3452 [Anopheles gambiae str. PEST]                             | 0.182  | 0.226  | 0.253  | 0.198  | -0.063 | 0.226  | 0.171  | 0.012  | 0.012 | 0.040 | 0.216 |
| pgp1n.pk008.m17 |           | HMGB1     | No Hits Found                                                      | 0.261  | 0.106  | 0.196  | -0.022 | 0.019  | 0.001  | nd     | -0.259 | 0.011 | 0.012 | 0.674 |
| pgf1n.pk009.o4  | NP_005156 | ALDOC     | aldolase C                                                         | 0.021  | -0.088 | 0.061  | 0.022  | -0.219 | -0.147 | -0.181 | -0.144 | 0.036 | 0.943 | 0.831 |
| pgf1n.pk002.i7  | NP_003063 | SMARCA4   | BRG1 protein [Gallus gallus]                                       | 0.175  | 0.134  | 0.097  | 0.225  | -0.063 | 0.383  | 0.396  | 0.211  | 0.203 | 0.063 | 0.009 |
| pgp1n.pk007.i1  | XP_371885 | C5orf13   | NEURONAL PROTEIN 3.1 (P311 PROTEIN)                                | 0.298  | 0.139  | 0.190  | 0.098  | 0.059  | 0.236  | 0.085  | 0.048  | 0.062 | 0.141 | 0.035 |
| pgm2n.pk003.e23 |           |           | No Hits Found                                                      | 0.277  | 0.199  | 0.308  | 0.162  | 0.040  | 0.147  | 0.147  | 0.083  | 0.049 | 0.714 | 0.726 |
| pgm2n.pk002.b21 | NP_055781 |           | Unknown (protein for MGC:27662) [Mus musculus]                     | 0.294  | 0.341  | 0.277  | 0.156  | 0.059  | 0.154  | 0.115  | 0.120  | 0.020 | 0.622 | 0.674 |
| pgp2n.pk007.d10 | NP_055378 | TRAPPC2   | RIKEN cDNA 1110068L09 [Mus musculus]                               | 0.358  | 0.255  | 0.214  | 0.152  | 0.125  | 0.231  | 0.189  | 0.085  | 0.945 | 0.143 | 0.257 |
| pgp1c.pk002.e9  | NP_004453 | FDFT1</   |                                                                    |        |        |        |        |        |        |        |        |       |       |       |

|                 |           |                             |               |        |        |        |        |        |        |        |       |       |       |       |
|-----------------|-----------|-----------------------------|---------------|--------|--------|--------|--------|--------|--------|--------|-------|-------|-------|-------|
| ppg2n.pk002.a16 |           | No Hits Found               | 0.294         | 0.291  | 0.306  | 0.281  | 0.179  | 0.039  | 0.270  | 0.268  | 0.009 | 0.132 | 0.148 |       |
| pnlb.pk0005.g7  | NP_057303 | MAN1B1                      | No Hits Found | 0.147  | 0.116  | 0.220  | 0.080  | 0.035  | 0.089  | 0.056  | 0.036 | 0.022 | 0.466 | 0.507 |
| pgfn.pk0011.g1  | NP_078799 | No Hits Found               | -0.153        | -0.079 | -0.065 | -0.029 | -0.265 | -0.231 | -0.190 | -0.119 | 0.025 | 0.297 | 0.978 |       |
| pf1c.pk002.g12  |           | No Hits Found               | -0.067        | -0.044 | -0.046 | 0.219  | -0.178 | 0.167  | 0.195  | -0.072 | 0.888 | 0.149 | 0.029 |       |
| pgm2n.pk002.k9  | NP_005799 | CTDSP1                      | -0.038        | -0.030 | -0.070 | 0.020  | -0.148 | 0.071  | 0.031  | -0.074 | 0.982 | 0.157 | 0.039 |       |
| pgm2n.pk002.d12 | NP_004627 |                             | 0.095         | 0.111  | 0.055  | 0.011  | -0.015 | 0.000  | 0.052  | 0.104  | 0.254 | 0.970 | 0.049 |       |
| pgm2n.pk006.h16 | NP_056118 |                             | 0.137         | 0.184  | 0.165  | 0.055  | 0.028  | 0.048  | 0.068  | 0.097  | 0.023 | 0.444 | 0.906 |       |
| pgfn.pk007.i13  | NP_688497 |                             | 0.087         | 0.184  | 0.101  | 0.102  | -0.025 | 0.098  | 0.306  | 0.037  | 0.017 | 0.150 | 0.897 |       |
| pgm2n.pk003.i3  | NP_940983 |                             | 0.010         | 0.017  | 0.048  | 0.096  | -0.097 | 0.030  | 0.036  | -0.014 | 0.048 | 0.086 | 0.232 |       |
| pgp1n.pk005.h1  | NP_000405 | HSD17B4                     | -0.015        | 0.040  | -0.096 | -0.102 | -0.119 | -0.046 | -0.048 | -0.053 | 0.273 | 0.059 | 0.019 |       |
| pgp1n.pk012.b5  |           | SPOCK1                      | No Hits Found | 0.158  | 0.197  | 0.094  | 0.090  | 0.054  | 0.012  | 0.070  | 0.044 | 0.003 | 0.699 | 0.152 |
| pgm2n.pk007.g19 | NP_872617 | PLTP                        | 0.345         | 0.322  | 0.390  | 0.236  | 0.250  | 0.153  | 0.171  | 0.308  | 0.045 | 0.836 | 0.172 |       |
| pcot1.pk001.e22 |           | No Hits Found               | 0.148         | 0.175  | 0.203  | 0.024  | 0.056  | 0.153  | -0.017 | 0.119  | 0.116 | 0.343 | 0.400 |       |
| pgp1n.pk007.a12 |           | CACNA2D2                    | -0.007        | -0.061 | -0.132 | 0.154  | -0.099 | 0.130  | 0.181  | 0.048  | 0.143 | 0.240 | 0.015 |       |
| pgm2n.pk003.c19 |           | ACRC protein [Homo sapiens] | 0.170         | 0.142  | 0.187  | 0.104  | 0.088  | 0.071  | 0.074  | 0.076  | 0.038 | 0.802 | 0.843 |       |
| pgm2n.pk002.j11 | NP_055951 | No Hits Found               | 0.094         | 0.134  | 0.104  | 0.047  | 0.014  | -0.003 | 0.063  | 0.071  | 0.024 | 0.835 | 0.145 |       |
| pgm2n.pk002.e4  | NP_057951 | RNA-binding protein Raly    | 0.085         | 0.069  | 0.100  | 0.035  | 0.006  | 0.052  | 0.106  | 0.025  | 0.028 | 0.704 | 0.439 |       |
| pgm2n.pk003.i20 | NP_006343 | ZNF238                      | 0.100         | 0.061  | 0.069  | -0.035 | 0.022  | 0.043  | -0.102 | -0.056 | 0.006 | 0.010 | 0.112 |       |
| pgm2n.pk006.g5  |           | No Hits Found               | 0.176         | 0.166  | 0.158  | 0.164  | 0.105  | 0.119  | 0.062  | 0.065  | 0.030 | 0.875 | 0.959 |       |
| pgfn.pk006.a8   | NP_653324 | ZMAT2                       | -0.245        | -0.038 | 0.000  | -0.110 | -0.114 | -0.165 | -0.082 | 0.015  | 0.162 | 0.353 | 0.016 |       |
| pgfn.pk002.m5   | NP_036579 |                             | 0.062         | 0.251  | 0.235  | 0.239  | 0.194  | 0.148  | 0.152  | 0.157  | 0.046 | 0.899 | 0.989 |       |
| pgfn.pk014.b14  | NP_077024 |                             | -0.031        | 0.050  | 0.181  | -0.020 | -0.099 | -0.029 | -0.240 | -0.045 | 0.026 | 0.866 | 0.120 |       |
| pgp1n.pk003.h23 | NP_006612 | AHCVL1                      | 0.083         | -0.160 | -0.038 | 0.009  | 0.016  | 0.117  | -0.077 | -0.065 | 0.580 | 0.373 | 0.020 |       |
| pf1c.pk003.a10  | NP_055594 |                             | 0.124         | 0.098  | 0.163  | -0.119 | 0.059  | 0.048  | -0.026 | 0.053  | 0.427 | 0.156 | 0.034 |       |
| pgp1n.pk002.c16 | NP_055701 |                             | -0.108        | -0.054 | -0.077 | -0.163 | -0.168 | -0.115 | -0.227 | -0.047 | 0.215 | 0.405 | 0.036 |       |
| pgm2n.pk004.e6  | NP_005112 | THRAP1                      | 0.209         | 0.208  | 0.124  | 0.047  | 0.151  | 0.111  | 0.028  | 0.006  | 0.020 | 0.003 | 0.874 |       |
| pgm2n.pk002.b6  |           | CYB5B                       | 0.195         | 0.195  | 0.161  | 0.017  | 0.140  | 0.101  | -0.026 | 0.003  | 0.050 | 0.553 | 0.526 |       |
| pgm2n.pk004.f24 | NP_689940 | CPNE2                       | 0.169         | 0.157  | 0.193  | 0.041  | 0.114  | 0.066  | 0.030  | 0.023  | 0.044 | 0.241 | 0.589 |       |
| pgfn.pk001.e8   |           | CRBP                        | -0.041        | 0.013  | -0.117 | 0.022  | -0.093 | 0.043  | 0.113  | -0.052 | 0.384 | 0.387 | 0.035 |       |
| pgp1n.pk013.e10 | NP_005861 | SAP18                       | 0.009         | -0.151 | -0.189 | -0.275 | -0.043 | -0.242 | -0.334 | 0.067  | 0.781 | 0.019 | 0.020 |       |
| pgm2n.pk007.g15 | NP_057154 | MRP523                      | 0.173         | 0.159  | 0.165  | 0.012  | 0.123  | 0.141  | -0.034 | 0.123  | 0.267 | 0.148 | 0.038 |       |
| pgp1n.pk001.i15 | NP_520407 | MAPK1                       | -0.015        | 0.032  | 0.024  | -0.024 | -0.013 | 0.027  | 0.172  | 0.184  | 0.027 | 0.017 | 0.017 |       |
| pgfn.pk003.n17  | NP_031388 | NCBP2                       | 0.000         | 0.006  | -0.015 | 0.407  | -0.040 | -0.077 | 0.165  | -0.359 | 0.066 | 0.705 | 0.045 |       |
| pgfn.pk008.h14  | NP_620124 | RHOT2                       | -0.121        | -0.083 | -0.109 | 0.000  | -0.161 | -0.213 | -0.145 | -0.107 | 0.028 | 0.193 | 0.681 |       |
| pgm2n.pk003.f8  |           | No Hits Found               | 0.110         | 0.098  | 0.111  | -0.051 | 0.071  | 0.050  | 0.011  | 0.104  | 0.793 | 0.468 | 0.037 |       |
| pgfn.pk014.e11  |           | No Hits Found               | 0.071         | 0.199  | 0.143  | 0.016  | 0.036  | 0.075  | -0.100 | 0.055  | 0.047 | 0.258 | 0.158 |       |
| pgp2n.pk004.o16 | NP_005476 |                             | 0.090         | 0.022  | 0.031  | -0.008 | 0.060  | 0.049  | -0.087 | 0.105  | 0.928 | 0.021 | 0.014 |       |
| pgfn.pk001.o10  | XP_291064 |                             | 0.243         | 0.211  | 0.252  | 0.096  | 0.218  | 0.177  | 0.139  | 0.190  | 0.406 | 0.087 | 0.033 |       |
| pgp2n.pk010.k9  |           | No Hits Found               | 0.009         | 0.052  | 0.020  | -0.035 | -0.016 | -0.080 | -0.247 | -0.030 | 0.037 | 0.365 | 0.195 |       |
| pgp2n.pk003.k24 | NP_004791 | TM9SF2                      | 0.115         | 0.089  | 0.099  | -0.113 | 0.092  | 0.095  | 0.082  | 0.319  | 0.003 | 0.975 | 0.001 |       |
| pgfn.pk004.g17  | NP_002796 | PSMC5                       | 0.163         | -0.100 | -0.172 | -0.212 | -0.186 | -0.258 | -0.289 | -0.196 | 0.043 | 0.469 | 0.177 |       |
| pnlb.pk0010.d5  | NP_002942 | RPN2                        | -0.110        | 0.138  | 0.080  | -0.034 | 0.087  | -0.058 | 0.012  | 0.120  | 0.353 | 0.730 | 0.031 |       |
| pgp1n.pk002.o6  | NP_001687 | ATP8V1E1                    | 0.028         | 0.072  | -0.006 | 0.125  | 0.007  | 0.278  | 0.120  | -0.012 | 0.240 | 0.028 | 0.011 |       |
| pgm2n.pk013.c12 | NP_078811 | COR07                       | -0.015        | 0.096  | -0.065 | 0.014  | -0.034 | -0.123 | -0.145 | -0.053 | 0.006 | 0.054 | 0.459 |       |
| pgm2n.pk012.i15 | NP_055799 | AZI1                        | -0.010        | 0.129  | -0.013 | 0.075  | -0.028 | -0.069 | -0.190 | 0.056  | 0.123 | 0.176 | 0.033 |       |
| pgp1n.pk002.g4  | NP_110378 | ZEB1                        | -0.037        | -0.085 | -0.203 | 0.025  | -0.046 | -0.045 | 0.064  | -0.066 | 0.197 | 0.752 | 0.036 |       |
| pgm2n.pk004.g11 |           | No Hits Found               | 0.073         | 0.032  | 0.113  | -0.012 | 0.065  | 0.062  | 0.003  | 0.043  | 0.665 | 0.245 | 0.025 |       |
| pgp2n.pk009.a17 |           | No Hits Found               | 0.135         | 0.156  | 0.158  | 0.050  | 0.128  | -0.005 | -0.087 | 0.064  | 0.039 | 0.505 | 0.074 |       |
| pgp2n.pk004.m24 | NP_000700 | BCKDHA                      | 0.001         | 0.067  | -0.027 | -0.233 | -0.006 | 0.022  | -0.206 | 0.034  | 0.838 | 0.052 | 0.128 |       |
| pgm2n.pk013.c19 |           | No Hits Found               | -0.127        | -0.086 | -0.133 | 0.016  | -0.131 | -0.026 | 0.028  | 0.039  | 0.016 | 0.001 | 0.129 |       |
| pgp1n.pk011.o12 | NP_054909 |                             | -0.002        | -0.037 | -0.046 | 0.120  | -0.003 | 0.078  | 0.133  | 0.036  | 0.086 | 0.250 | 0.025 |       |
| pgp2n.pk005.k22 |           | PKP4                        | 0.137         | 0.180  | 0.057  | 0.067  | 0.138  | 0.033  | -0.017 | 0.014  | 0.018 | 0.011 | 0.184 |       |
| pgp1n.pk012.g16 | XP_034872 |                             | 0.038         | 0.033  | -0.021 | 0.065  | 0.039  | -0.031 | 0.178  | 0.042  | 0.164 | 0.060 | 0.001 |       |
| pgp1c.pk002.m24 | NP_075063 |                             | -0.204        | -0.165 | -0.358 | -0.132 | -0.198 | -0.013 | 0.041  | 0.062  | 0.004 | 0.227 | 0.130 |       |
| pgp1n.pk008.n6  | NP_006536 | TUSC4                       | -0.017        | -0.137 | -0.149 | -0.316 | -0.008 | 0.020  | -0.145 | 0.575  | 0.000 | 0.466 | 0.001 |       |
| pgp1n.pk006.d21 | NP_149035 |                             | -0.090        | 0.086  | 0.135  | 0.030  | -0.080 | 0.011  | 0.227  | -0.179 | 0.053 | 0.128 | 0.029 |       |
| pgp1n.pk009.i2  | NP_000963 |                             | nd            | 0.416  | -0.336 | -0.405 | 0.012  | -0.137 | -0.102 | 0.290  | 0.041 | 0.724 | 0.505 |       |
| pgf2c.pk001.i15 | NP_000080 | COL1A2                      | 0.230         | 0.303  | 0.150  | 0.020  | 0.245  | 0.165  | -0.051 | 0.133  | 0.185 | 0.004 | 0.036 |       |
| pgm2n.pk004.f18 | NP_036250 | CCRN4L                      | 0.160         | 0.398  | 0.135  | 0.009  | 0.176  | 0.049  | 0.001  | 0.010  | 0.028 | 0.029 | 0.064 |       |
| pgfn.pk006.e8   | NP_004707 | PCSK7                       | 0.078         | 0.153  | 0.137  | -0.088 | 0.095  | -0.101 | 0.012  | 0.077  | 0.190 | 0.217 | 0.007 |       |
| pgp2n.pk008.h19 | NP_001312 |                             | 0.024         | 0.101  | 0.088  | -0.116 | 0.045  | 0.005  | -0.209 | 0.033  | 0.308 | 0.384 | 0.041 |       |
| pgp1n.pk011.i5  | NP_001476 | GBX2                        | -0.010        | -0.031 | 0.058  | 0.003  | 0.012  | 0.017  | -0.131 | -0.038 | 0.240 | 0.799 | 0.037 |       |
| pgf2n.pk002.i2  | NP_003863 | NRP2                        | -0.250        | -0.264 | -0.296 | -0.067 | -0.226 | -0.224 | -0.079 | -0.167 | 0.220 | 0.079 | 0.047 |       |
| pgp2n.pk004.d17 | NP_258412 |                             | -0.037        | -0.028 | -0.217 | 0.014  | -0.010 | -0.013 | 0.032  | -0.067 | 0.155 | 0.407 | 0.022 |       |
| pgp1n.pk010.h11 | NP_003160 | SUPT5H                      | -0.129        | -0.144 | -0.134 | 0.030  | -0.101 | -0.114 | 0.076  | -0.098 | 0.124 | 0.132 | 0.047 |       |
| pf1c.pk003.b7   |           | No Hits Found               | -0.118        | -0.177 | -0.118 | 0.010  | -0.060 | -0.027 | 0.094  | 0.109  | 0.048 | 0.281 | 0.724 |       |
| pgp1n.pk003.h15 | NP_005722 |                             | -0.248        | -0.332 | -0.345 | -0.052 | -0.217 | -0.117 | -0.201 | -0.295 | 0.488 | 0.576 | 0.017 |       |
| pgp2n.pk006.p20 | NP_065585 | PACS1N                      | 0.202         | 0.237  | 0.266  | 0.093  | 0.234  | 0.085  | 0.164  | 0.269  | 0.775 | 0.689 | 0.032 |       |
| pnlb.pk0005.g9  | NP_056290 | FAM38A                      | 0.040         | 0.086  | 0.147  | -0.028 | 0.076  | -0.040 | -0.099 | -0.025 | 0.043 | 0.515 | 0.066 |       |
| pgp1n.pk005.e24 | NP_000399 | GP2D                        | -0.206        | -0.257 | -0.148 | -0.018 | -0.168 | -0.093 | 0.045  | 0.037  | 0.048 | 0.042 | 0.677 |       |
| pn1s.pk001.f3   |           | No Hits Found               | -0.178        | -0.117 | -0.136 | -0.008 | -0.137 | -0.055 | -0.002 | -0.035 | 0.049 | 0.011 | 0.195 |       |
| pgm2n.pk002.d5  | NP_005331 | FHIT                        | 0.195         | 0.272  | 0.079  | -0.081 | 0.239  | 0.001  | -0.060 | 0.077  | 0.201 | 0.001 | 0.005 |       |
| pgfn.pk001.c20  | NP_079130 |                             | -0.185        | -0.166 | -0.201 | -0.003 | -0.139 | -0.180 | -0.031 | -0.191 | 0.933 | 0.552 | 0.038 |       |
| pn1s.pk003.a6   |           | No Hits Found               | 0.018         | 0.035  | 0.075  | -0.121 | 0.066  | 0.003  | -0.184 | 0.008  | 0.530 | 0.285 | 0.031 |       |
| pgm2n.pk007.k15 | NP_076990 | ATG9A                       | -0.034        | -0.067 | -0.057 | 0.086  | 0.014  | -0.121 | 0.070  | -0.138 | 0.519 | 0.302 | 0.034 |       |
| pf1c.pk004.e10  | NP_291024 |                             |               |        |        |        |        |        |        |        |       |       |       |       |

|                 |           |                                        |                                                                                |        |        |        |        |        |        |        |        |       |       |       |
|-----------------|-----------|----------------------------------------|--------------------------------------------------------------------------------|--------|--------|--------|--------|--------|--------|--------|--------|-------|-------|-------|
| ppr1n.pk002.p16 | NP_056012 | PACS2                                  | hypothetical protein KIAA0602 - human (fragment)                               | -0.036 | -0.054 | -0.041 | 0.099  | 0.066  | 0.055  | 0.121  | 0.100  | 0.026 | 0.242 | 0.539 |
| ppm2n.pk011.n14 | NP_444281 | TADA1L                                 | SPT3-associated factor 42 [Homo sapiens]                                       | -0.344 | -0.216 | -0.423 | -0.069 | -0.242 | -0.139 | -0.005 | -0.128 | 0.037 | 0.186 | 0.067 |
| ppp2n.pk007.k19 |           | No Hits Found                          | No Hits Found                                                                  | -0.153 | -0.161 | -0.271 | -0.001 | -0.050 | -0.091 | 0.054  | -0.010 | 0.035 | 0.366 | 0.211 |
| ppr1n.pk006.g22 | NP_000017 | ADSL                                   | Adenylosuccinate lyase (Adenylosuccinase) (ASL) (ASASE)                        | 0.102  | 0.142  | 0.109  | -0.036 | 0.206  | 0.053  | 0.100  | 0.162  | 0.151 | 0.390 | 0.035 |
| ppp1n.pk004.p6  |           | No Hits Found                          | No Hits Found                                                                  | -0.202 | -0.135 | -0.192 | -0.069 | -0.097 | -0.051 | -0.001 | -0.051 | 0.030 | 0.522 | 0.556 |
| ppp1n.pk007.n9  | NP_004374 | CSK                                    | Tyrosine-protein kinase CSK (C-SRC kinase)                                     | -0.233 | -0.210 | -0.200 | -0.035 | -0.128 | 0.010  | -0.035 | -0.055 | 0.010 | 0.185 | 0.243 |
| ppm2n.pk008.d4  | NP_057094 |                                        | Similia1 CG-62 protein [Homo sapiens]                                          | 0.052  | 0.075  | 0.073  | 0.152  | 0.140  | 0.040  | 0.040  | 0.040  | 0.041 | 0.328 | 0.191 |
| ppp2n.pk004.i3  | NP_006159 | NKX6-2                                 | homeodomain protein [Gallus gallus]                                            | 0.016  | 0.035  | 0.061  | 0.026  | 0.122  | 0.004  | -0.001 | 0.043  | 0.704 | 0.316 | 0.033 |
| ppp1n.pk014.j22 | NP_006689 | BLCAP                                  | bladder cancer associated protein [Homo sapiens]                               | -0.171 | -0.128 | -0.134 | 0.085  | -0.063 | 0.131  | 0.085  | 0.012  | 0.000 | 0.004 | 0.003 |
| ppp1n.pk003.n3  | NP_116236 | No Hits Found                          | No Hits Found                                                                  | 0.040  | 0.151  | 0.074  | -0.071 | 0.147  | 0.042  | -0.051 | 0.065  | 0.948 | 0.165 | 0.042 |
| ppp1c.pk002.e5  |           | SCAP                                   | Sterol regulatory element binding protein cleavage-activating protein          | -0.238 | -0.184 | -0.258 | -0.340 | -0.128 | -0.234 | -0.178 | -0.104 | 0.041 | 0.890 | 0.130 |
| ppp1n.pk004.o2  | NP_000588 | IGFBP2                                 | Insulin-like growth factor binding protein 2 precursor (IGFBP-2)               | -0.429 | -0.421 | -0.335 | -0.051 | -0.318 | -0.021 | -0.047 | -0.081 | 0.009 | 0.020 | 0.152 |
| ppm2n.pk003.l4  |           | No Hits Found                          | No Hits Found                                                                  | -0.031 | -0.040 | -0.062 | -0.022 | 0.081  | -0.100 | 0.004  | -0.039 | 0.214 | 0.024 | 0.024 |
| ppp1n.pk007.f7  | NP_057175 |                                        | eukaryotic translation initiation factor 3, subunit 6 interacting protein      | -0.131 | -0.082 | -0.124 | -0.003 | -0.019 | -0.002 | -0.011 | -0.021 | 0.047 | 0.571 | 0.499 |
| ppp1n.pk011.e7  | NP_689676 | LRR59                                  | ribosome-binding protein p34 - rat                                             | -0.145 | -0.125 | -0.191 | -0.033 | -0.030 | -0.093 | -0.028 | -0.024 | 0.025 | 0.313 | 0.369 |
| ppp1n.pk002.m3  | NP_055509 | ADAMTS2                                | KIAA0605 gene product [Homo sapiens]                                           | 0.123  | 0.085  | 0.028  | 0.039  | 0.238  | 0.104  | -0.039 | -0.040 | 0.898 | 0.000 | 0.039 |
| ppp2n.pk008.f18 | NP_003161 | SUPT16H                                | similar to emb-5 protein of C.elegans. [Homo sapiens]                          | 0.012  | -0.001 | -0.066 | -0.094 | 0.127  | -0.170 | -0.032 | -0.067 | 0.953 | 0.005 | 0.022 |
| ppp1n.pk008.h7  | NP_003280 | TPM2                                   | beta-tropomyosin                                                               | -0.095 | -0.128 | -0.194 | 0.138  | 0.020  | 0.158  | 0.087  | 0.065  | 0.017 | 0.210 | 0.050 |
| ppp2n.pk004.o6  |           | No Hits Found                          | No Hits Found                                                                  | -0.009 | -0.063 | -0.071 | -0.049 | 0.109  | -0.088 | -0.012 | -0.038 | 0.037 | 0.000 | 0.060 |
| ppm2n.pk009.d24 | NP_065802 | COG6                                   | similar to C61968 gene product [Homo sapiens]                                  | -0.090 | -0.126 | -0.151 | -0.047 | 0.030  | -0.093 | -0.001 | -0.074 | 0.020 | 0.252 | 0.119 |
| ppp2n.pk007.i18 |           | NUD24                                  | No Hits Found                                                                  | 0.072  | 0.180  | 0.130  | 0.015  | 0.192  | 0.044  | 0.002  | 0.088  | 0.637 | 0.395 | 0.043 |
| ppp1n.pk001.n7  | NP_002334 | TF                                     | Ovotransferin precursor (Conalbumin) (Allergen Gal d 3) (Gal d III)            | -0.161 | -0.203 | -0.264 | -0.372 | -0.040 | -0.015 | -0.085 | -0.082 | 0.000 | 0.096 | 0.466 |
| ppp1n.pk009.j4  | NP_056207 | NPDC1                                  | Similar to neural proliferation, differentiation and control gene 1            | -0.015 | -0.069 | -0.057 | 0.015  | 0.106  | 0.000  | 0.077  | 0.035  | 0.020 | 0.462 | 0.575 |
| ppp2n.pk008.g10 | NP_116120 | TXNL5                                  | No Hits Found                                                                  | 0.042  | 0.155  | 0.269  | -0.006 | 0.164  | 0.062  | -0.090 | 0.091  | 0.177 | 0.648 | 0.003 |
| ppp1n.pk001.i15 | NP_848611 | EXOC3L                                 | unnamed protein product [Mus musculus]                                         | -0.273 | -0.306 | -0.302 | -0.027 | -0.151 | -0.046 | -0.060 | -0.080 | 0.036 | 0.336 | 0.312 |
| ppp2n.pk004.c1  |           | No Hits Found                          | No Hits Found                                                                  | -0.035 | -0.186 | -0.194 | -0.102 | 0.087  | -0.123 | -0.061 | -0.073 | 0.018 | 0.005 | 0.660 |
| ppp2n.pk001.i6  |           | ING3                                   | RIKEN cDNA 1300013A07 gene [Mus musculus]                                      | -0.200 | -0.206 | -0.231 | -0.215 | -0.077 | -0.099 | -0.116 | -0.157 | 0.017 | 0.829 | 0.935 |
| ppp2n.pk004.b23 | NP_006658 |                                        | Membrane associated progesterone receptor component 1                          | -0.145 | -0.060 | -0.110 | 0.031  | -0.021 | -0.029 | 0.079  | 0.012  | 0.032 | 0.228 | 0.191 |
| ppp1n.pk003.b21 | NP_149014 |                                        | unnamed protein product [Mus musculus]                                         | -0.144 | -0.039 | -0.180 | -0.024 | -0.019 | -0.102 | 0.032  | -0.008 | 0.027 | 0.324 | 0.030 |
| ppp2n.pk006.k5  | NP_114131 |                                        | transmembrane protein induced by tumor necrosis factor alpha                   | -0.330 | -0.242 | -0.382 | -0.014 | -0.204 | 0.001  | -0.028 | -0.172 | 0.048 | 0.271 | 0.056 |
| ppp2n.pk006.e11 | NP_036549 | PITPNC1                                | retinal degeneration B beta [Homo sapiens]                                     | -0.188 | -0.104 | -0.154 | -0.060 | -0.042 | -0.064 | -0.027 | -0.046 | 0.016 | 0.650 | 0.420 |
| ppp1n.pk010.j21 | NP_004069 | CSRP1                                  | alpha-domain protein GRP1 [Coturnix japonica]                                  | -0.255 | -0.273 | -0.238 | -0.005 | -0.131 | -0.019 | -0.011 | -0.059 | 0.637 | 0.019 | 0.219 |
| ppp1n.pk008.d22 | NP_001822 | CLU                                    | clusterin [Gallus gallus]                                                      | -0.523 | -0.181 | -0.166 | 0.045  | -0.395 | -0.380 | -0.167 | -0.047 | 0.291 | 0.000 | 0.043 |
| ppm2n.pk010.b15 | NP_006082 | CORO2B                                 | KIAA0925 protein [Homo sapiens]                                                | -0.139 | -0.115 | -0.161 | -0.002 | -0.009 | -0.017 | 0.021  | -0.012 | 0.005 | 0.400 | 0.196 |
| ppr1n.pk006.j22 |           | No Hits Found                          | No Hits Found                                                                  | 0.094  | 0.152  | 0.141  | -0.128 | 0.225  | 0.048  | 0.058  | 0.168  | 0.117 | 0.118 | 0.074 |
| ppp1n.pk003.e14 | NP_937994 |                                        | hypothetical protein FLJ11021 similar to splicing factor, argini               | -0.400 | -0.296 | -0.243 | 0.046  | -0.270 | -0.062 | 0.152  | 0.043  | 0.014 | 0.006 | 0.206 |
| ppp1c.pk007.d3  |           | No Hits Found                          | No Hits Found                                                                  | -0.594 | -0.799 | -0.624 | -0.253 | -0.463 | -0.265 | -0.313 | -0.263 | 0.307 | 0.248 | 0.351 |
| ppp2n.pk003.g3  | NP_008938 | GLT2SD2                                | similar to chromosome 1 open reading frame 17 [Homo sapiens]                   | -0.044 | 0.032  | -0.049 | -0.156 | 0.087  | -0.119 | -0.083 | 0.027  | 0.040 | 0.252 | 0.011 |
| ppp1n.pk008.i2  | NP_055916 | VPS33B                                 | similar to vacuolar protein sorting homolog v-ps33b [Rattus norvegicus] [Mus m | -0.092 | -0.023 | -0.073 | 0.002  | 0.040  | 0.044  | -0.031 | 0.055  | 0.048 | 0.377 | 0.793 |
| ppm2n.pk005.l4  | NP_061138 |                                        | similar to vacuolar protein sorting homolog v-ps33b [Rattus norvegicus] [Mus m | -0.009 | -0.114 | -0.189 | -0.139 | 0.122  | -0.166 | -0.145 | 0.011  | 0.039 | 0.000 | 0.122 |
| ppp2n.pk010.f24 | NP_005975 |                                        | mitochondrial citrate transport protein [Homo sapiens]                         | -0.097 | -0.217 | -0.634 | -0.738 | 0.036  | -0.498 | -0.470 | -0.028 | 0.113 | 0.030 | 0.044 |
| ppp2n.pk007.h9  | NP_004852 | GAL3ST1                                | Similar to cerebroside sulfotransferase [Homo sapiens]                         | -0.065 | 0.069  | 0.222  | -0.084 | 0.068  | -0.081 | -0.102 | 0.027  | 0.279 | 0.786 | 0.028 |
| ppp2n.pk001.n9  | NP_000129 | FBN1                                   | similar to fibrillin [Homo sapiens]                                            | 0.101  | 0.152  | 0.186  | 0.031  | 0.234  | -0.058 | 0.003  | 0.184  | 0.590 | 0.447 | 0.018 |
| ppp1n.pk007.i11 | NP_115785 | PINK1                                  | PTEN induced putative kinase 1 [Mus musculus]                                  | -0.196 | -0.181 | -0.192 | -0.018 | -0.062 | -0.102 | -0.055 | -0.048 | 0.028 | 0.121 | 0.285 |
| ppp1n.pk001.i16 | NP_008963 | GCAT                                   | KIAA1662 protein [Homo sapiens]                                                | -0.156 | -0.100 | -0.094 | 0.213  | -0.022 | -0.224 | -0.269 | -0.136 | 0.568 | 0.293 | 0.019 |
| ppp2n.pk002.m20 | NP_663747 |                                        | cell division cycle associated 4 [Homo sapiens]                                | -0.144 | -0.125 | -0.148 | 0.022  | -0.010 | -0.029 | 0.027  | -0.012 | 0.001 | 0.104 | 0.052 |
| ppp1n.pk003.m11 | NP_114155 | TTLL2                                  | NYD-TSPG protein [Homo sapiens]                                                | 0.129  | 0.101  | 0.342  | -0.119 | 0.263  | 0.115  | nd     | 0.199  | 0.020 | 0.049 | 0.164 |
| ppm2n.pk011.e18 | NP_002472 |                                        | M21 chain - chicken                                                            | -0.200 | -0.140 | -0.168 | -0.109 | -0.065 | -0.173 | -0.001 | -0.040 | 0.016 | 0.251 | 0.163 |
| ppm2n.pk009.h1  | NP_055617 | KIAA0528                               | hypothetical protein KIAA0528 - human                                          | 0.030  | 0.045  | 0.047  | -0.069 | 0.166  | -0.073 | -0.088 | -0.066 | 0.409 | 0.015 | 0.035 |
| ppp1n.pk004.f20 | NP_115696 | BTBD10                                 | RIKEN cDNA 1110056N09 [Mus musculus]                                           | -0.269 | -0.146 | -0.206 | -0.123 | -0.134 | -0.133 | -0.043 | -0.028 | 0.021 | 0.218 | 0.589 |
| ppp1n.pk003.e11 | NP_005040 | PWP2                                   | PWP2 protein [Homo sapiens]                                                    | 0.250  | 0.201  | 0.239  | -0.041 | 0.388  | 0.068  | -0.006 | 0.157  | 0.832 | 0.019 | 0.018 |
| ppp2n.pk001.p20 |           | No Hits Found                          | No Hits Found                                                                  | -0.073 | -0.065 | -0.097 | -0.109 | 0.064  | -0.132 | 0.133  | -0.067 | 0.490 | 0.157 | 0.022 |
| ppm2n.pk003.p22 | NP_002201 | ITGAV                                  | Integrin alpha-V precursor (Vitronectin receptor alpha subunit)                | 0.033  | 0.025  | 0.007  | 0.054  | 0.170  | -0.077 | -0.108 | -0.026 | 0.690 | 0.011 | 0.036 |
| ppp2n.pk009.n5  |           | No Hits Found                          | No Hits Found                                                                  | 0.025  | 0.085  | 0.022  | -0.021 | 0.164  | -0.117 | 0.048  | 0.122  | 0.563 | 0.417 | 0.044 |
| ppp2n.pk005.b5  | XP_035527 | KIAA1370                               | similar to KIAA1370 protein [Homo sapiens]                                     | -0.208 | -0.409 | -0.257 | -0.109 | -0.068 | -0.024 | -0.088 | -0.209 | 0.003 | 0.686 | 0.006 |
| ppr1n.pk002.b14 |           | KBTD3                                  | No Hits Found                                                                  | -0.054 | 0.020  | 0.009  | 0.150  | 0.096  | 0.061  | 0.015  | 0.143  | 0.316 | 0.013 | 0.030 |
| ppp2n.pk008.i6  | NP_004242 | RAB9A                                  | RAB9A, member RAS oncogene family [Homo sapiens]                               | 0.114  | 0.118  | 0.079  | -0.116 | 0.254  | -0.040 | 0.070  | 0.071  | 0.920 | 0.021 | 0.030 |
| ppp1n.pk008.g16 | NP_085046 | ITIH5                                  | unnamed protein product [Mus musculus]                                         | -0.210 | -0.151 | -0.089 | 0.055  | -0.070 | -0.031 | 0.030  | 0.034  | 0.037 | 0.022 | 0.462 |
| ppp1n.pk013.n11 | NP_002323 | C10orf54                               | FLJ00041 protein [Homo sapiens]                                                | -0.071 | -0.022 | 0.018  | -0.253 | 0.070  | -0.099 | -0.128 | 0.152  | 0.163 | 0.845 | 0.031 |
| ppp1c.pk003.a3  | NP_003273 | TNNI2                                  | TROPONIN I, FAST SKELETAL MUSCLE                                               | -0.282 | -0.201 | -0.222 | -0.073 | -0.141 | -0.121 | -0.019 | -0.084 | 0.031 | 0.220 | 0.402 |
| ppp2n.pk002.b18 | NP_002563 | PAFAH1B2                               | platelet-activating factor acetylhydrolase alpha 2 subunit                     | 0.032  | 0.001  | 0.080  | 0.070  | 0.174  | -0.003 | 0.065  | 0.019  | 0.449 | 0.032 | 0.040 |
| ppp1n.pk001.n6  | NP_075526 | ANKRA2                                 | ankyrin repeat, family A (RF-XANK-like), 2 [Homo sapiens]                      | -0.136 | -0.120 | -0.151 | -0.100 | 0.007  | -0.119 | -0.031 | -0.086 | 0.005 | 0.400 | 0.077 |
| ppp1n.pk006.f16 | NP_620156 |                                        | BLOCK 25 [Homo sapiens]                                                        | -0.230 | -0.278 | -0.293 | -0.002 | -0.086 | -0.172 | 0.023  | -0.157 | 0.056 | 0.274 | 0.028 |
| ppp2n.pk006.o8  | NP_663324 | sRE-4                                  | [Homo sapiens]                                                                 | -0.425 | -0.221 | -0.314 | 0.070  | -0.281 | -0.014 | 0.111  | 0.027  | 0.016 | 0.005 | 0.174 |
| ppp1c.pk002.b11 | XP_036942 | No Hits Found                          | No Hits Found                                                                  | -0.149 | -0.168 | -0.206 | -0.039 | -0.004 | -0.131 | -0.131 | -0.137 | 0.184 | 0.089 | 0.044 |
| ppp2n.pk010.c15 | NP_002283 | LAMB2                                  | laminin beta 2-like chain [Gallus gallus]                                      | 0.043  | 0.076  | -0.020 | 0.004  | 0.187  | -0.050 | 0.068  | -0.037 | 0.634 | 0.066 | 0.041 |
| ppr1n.pk004.i8  | NP_036480 | LETM2                                  | leucine zipper-EF-hand containing transmembrane protein 1                      | 0.182  | 0.219  | 0.176  | 0.039  | 0.328  | 0.089  | 0.160  | 0.274  | 0.137 | 0.174 | 0.017 |
| ppm2n.pk006.p18 |           | unnamed protein product [Homo sapiens] | 0.095                                                                          | 0.089  | 0.101  | 0.024  | 0.241  | 0.042  | -0.066 | 0.036  | 0.696  | 0.021 | 0.035 | 0.035 |
| ppp1n.pk008.b3  | NP_072093 | No Hits Found                          | No Hits Found                                                                  | -0.177 | -0.226 | -0.169 | -0.124 | -0.031 | -0.133 | -0.055 | -0.136 | 0.019 | 0.419 | 0.365 |
| ppp1n.pk005.h17 | NP_037389 | SGK3                                   | unnamed protein product [Mus musculus]                                         | -0.028 | 0.009  | 0.058  | -0.064 | 0.120  | -0.010 | -0.019 | 0.013  | 0.239 | 0.280 | 0.027 |
| ppp2n.pk004.j1  | NP_065389 | PCBP3                                  | unnamed protein product [Homo sapiens]                                         | 0.010  | 0.041  | 0.048  | 0.027  | 0.157  | -0.059 | -0.033 | 0.063  | 0.678 | 0.274 | 0.036 |
| ppp1n.pk001.i14 | NP_003000 | SEPN1                                  | Selenoprotein W                                                                | -0.239 | -0.274 | -0.190 | 0.037  | -0.091 | -0.051 | 0.072  | -0.024 | 0.033 | 0.182 | 0.299 |
| ppp2n.pk001.m15 |           | EFCAB1                                 | No Hits Found                                                                  | -0.212 | -0.170 | -0.141 | -0.053 | -0.064 | -0.107 | -0.067 | -0.042 | 0.045 | 0.233 | 0.590 |
| ppp1n.pk008.k12 | NP_878899 |                                        | RIKEN cDNA 4933422M21 [Mus musculus]                                           | -0.221 | -0.179 | -0.222 | -0.071 | -0.073 | -0.087 | -0.009 | -0.041 | 0.015 | 0.491 | 0.535 |
| ppp1n.pk002.i9  | NP_115602 | ZCCHC7                                 | FLJ22611-like protein [Danio rerio]                                            | -0.398 | -0.287 | -0.340 | -0.047 | -0.249 | -0.140 | 0.011  | -0.065 | 0.034 | 0.082 | 0.369 |

|                 |           |           |                                                                     |        |        |        |        |        |        |        |        |       |       |       |
|-----------------|-----------|-----------|---------------------------------------------------------------------|--------|--------|--------|--------|--------|--------|--------|--------|-------|-------|-------|
| pgm1n.pk001.k12 | NP_065107 | C12orf4   | chromosome 12 open reading frame 4 [Homo sapiens]                   | -0.085 | -0.106 | -0.037 | -0.202 | 0.086  | 0.091  | -0.096 | -0.002 | 0.015 | 0.371 | 0.088 |
| pgf1n.pk008.a8  | NP_057568 |           | hypothetical protein LOC51248 [Homo sapiens]                        | -0.246 | -0.291 | -0.346 | 0.023  | -0.075 | -0.120 | 0.023  | -0.120 | 0.013 | 0.197 | 0.016 |
| pnlb.pk0001.b11 | NP_941961 |           | No Hits Found                                                       | 0.009  | 0.034  | -0.032 | -0.087 | 0.181  | -0.128 | -0.078 | -0.005 | 0.429 | 0.011 | 0.016 |
| pgf1n.pk005.o1  | NP_006761 | COL4A2    | putative scavenger receptor MARCO [Gallus gallus]                   | -0.253 | -0.344 | -0.248 | -0.122 | -0.080 | -0.133 | -0.137 | -0.076 | 0.030 | 0.389 | 0.755 |
| pgm1c.pk001.e20 | NP_000357 |           | Tropomyosin 1 alpha chain (Alpha-tropomyosin)                       | -0.212 | -0.125 | -0.201 | -0.015 | -0.038 | -0.028 | -0.045 | -0.040 | 0.006 | 0.157 | 0.171 |
| ppp1n.pk006.d14 | NP_006565 | CSPG5     | CALEB isoform b [Gallus gallus]                                     | -0.389 | -0.229 | -0.109 | 0.031  | -0.214 | -0.061 | 0.043  | -0.053 | 0.033 | 0.002 | 0.117 |
| ppp2n.pk006.s6  | NP_055886 | ARHGAP26  | CRAF protein [Homo sapiens]                                         | -0.266 | -0.193 | -0.217 | -0.037 | -0.081 | -0.091 | -0.089 | -0.038 | 0.033 | 0.033 | 0.291 |
| pgm2n.pk008.o16 | NP_563616 | ASB15     | ankyrin and SOCS box-containing protein 15 [Bos taurus]             | 0.241  | 0.335  | 0.267  | 0.178  | 0.422  | 0.235  | 0.168  | 0.221  | 0.828 | 0.036 | 0.034 |
| pgf1n.pk007.d11 | NP_057097 | NDUFAF1   | CGI-65 protein [Homo sapiens]                                       | -0.259 | -0.189 | -0.242 | 0.047  | -0.114 | -0.012 | 0.100  | 0.008  | 0.047 | 0.256 | 0.413 |
| pgf1n.pk008.k5  | NP_005012 | ENPP3     | ectonucleotide pyrophosphatase/phosphodiesterase 3                  | -0.390 | -0.348 | -0.429 | -0.071 | -0.182 | -0.174 | -0.046 | -0.080 | 0.019 | 0.215 | 0.323 |
| pcotc.pk001.o14 | NP_002309 |           | lysyl oxidase-like 2 [Homo sapiens]                                 | -0.170 | -0.099 | -0.099 | -0.202 | 0.006  | -0.184 | -0.293 | -0.131 | 0.835 | 0.199 | 0.009 |
| pgp1n.pk010.e16 | NP_000143 | GAA       | acid alpha glucosidase [Cutormix japonica]                          | -0.197 | -0.184 | -0.191 | -0.020 | -0.020 | -0.134 | -0.079 | -0.079 | 0.047 | 0.143 | 0.017 |
| pcotc.pk001.j9  | NP_077296 |           | hypothetical protein MGC11242 [Homo sapiens]                        | -0.005 | 0.066  | 0.098  | 0.005  | 0.173  | -0.004 | 0.021  | 0.031  | 0.597 | 0.336 | 0.012 |
| pgf1n.pk004.a12 | NP_612454 |           | hypothetical protein BC014241 [Homo sapiens]                        | -0.203 | -0.129 | -0.127 | -0.084 | -0.024 | -0.125 | -0.153 | -0.072 | 0.058 | 0.221 | 0.010 |
| pgf1n.pk003.c2  | NP_000775 | CYP27A1   | cytochrome P450, subfamily XXVIIA, polypeptide 1 precursor          | -0.283 | -0.193 | -0.248 | -0.173 | -0.101 | -0.153 | -0.159 | -0.086 | 0.016 | 0.536 | 0.627 |
| pgm2n.pk003.d19 | NP_036430 | CAND2     | hypothetical protein KIAA0667 - human (fragment)                    | -0.072 | -0.011 | -0.039 | -0.153 | 0.109  | -0.043 | -0.031 | 0.070  | 0.12  | 0.611 | 0.039 |
| pgf2n.pk005.d6  | NP_036223 | ADAT1     | adenosine deaminase, tRNA-specific 1 [Homo sapiens]                 | -0.085 | -0.164 | -0.176 | -0.170 | 0.097  | -0.028 | -0.189 | -0.065 | 0.036 | 0.049 | 0.380 |
| pgf2n.pk001.h17 | NP_057299 | EGFL7     | Estrogen-regulated protein CBL20, 20.4kD [Rattus norvegicus]        | -0.095 | -0.030 | -0.139 | -0.059 | 0.088  | -0.027 | -0.070 | -0.102 | 0.010 | 0.078 | 0.146 |
| ppp2n.pk003.i21 | NP_065698 | JPH1      | vesicle-associated membrane protein 1 [Mus musculus]                | -0.249 | -0.067 | -0.219 | -0.223 | -0.066 | -0.279 | -0.275 | -0.113 | 0.805 | 0.438 | 0.041 |
| ppp2n.pk010.m13 | NP_055157 | MTCH2     | Similar to MTCH2 [Gallus gallus]                                    | 0.049  | 0.195  | 0.140  | 0.025  | 0.233  | -0.014 | -0.072 | 0.044  | 0.530 | 0.185 | 0.011 |
| pgf1n.pk010.k1  | NP_055704 | PI3R1     | Similar to PI3R1 [Homo sapiens]                                     | -0.096 | 0.034  | -0.133 | 0.075  | 0.087  | -0.080 | -0.101 | -0.053 | 0.843 | 0.033 | 0.010 |
| ppp1n.pk003.h20 | NP_004506 | ILF2      | transcription factor NF-AT 45K chain - human                        | -0.179 | -0.226 | -0.284 | -0.175 | 0.006  | -0.059 | -0.062 | -0.076 | 0.039 | 0.859 | 0.948 |
| pgm2n.pk007.g5  | NP_000000 | HERC4     | No Hits Found                                                       | -0.248 | -0.198 | -0.237 | -0.012 | -0.062 | -0.171 | -0.106 | -0.128 | 0.068 | 0.051 | 0.008 |
| pgf1n.pk003.i10 | NP_055438 | MEA1      | unamed protein product [Mus musculus]                               | -0.287 | -0.121 | -0.136 | -0.067 | -0.101 | -0.085 | -0.181 | -0.150 | 0.419 | 0.096 | 0.013 |
| pgf1n.pk011.b23 | NP_055596 | RB1CC1    | Rb1-inducible coiled coil protein [Homo sapiens]                    | -0.204 | -0.163 | -0.212 | -0.061 | -0.017 | -0.001 | -0.085 | -0.068 | 0.044 | 0.724 | 0.613 |
| pgf1n.pk006.b7  |           |           | No Hits Found                                                       | -0.150 | -0.195 | -0.209 | 0.010  | 0.039  | -0.067 | 0.074  | -0.054 | 0.037 | 0.626 | 0.256 |
| pgp1n.pk014.o4  | NP_008858 | ST3GAL2   | similar to sialyltransferase 4B                                     | 0.181  | 0.252  | 0.207  | 0.325  | 0.371  | 0.126  | 0.265  | 0.334  | 0.375 | 0.066 | 0.039 |
| ppp2n.pk008.j1  | NP_057685 | KCNK9     | potassium channel, subfamily K, member 9 [Homo sapiens]             | 0.064  | 0.090  | 0.093  | 0.034  | 0.254  | 0.066  | -0.007 | 0.067  | 0.377 | 0.029 | 0.010 |
| pnf1s.pk001.b11 |           | VPS26A    | No Hits Found                                                       | -0.261 | -0.254 | -0.196 | -0.095 | -0.072 | -0.201 | -0.051 | -0.121 | 0.038 | 0.196 | 0.278 |
| pgf1n.pk010.i3  | NP_000044 | ATP7B     | ORF                                                                 | -0.188 | -0.063 | -0.145 | -0.095 | 0.001  | -0.075 | -0.129 | 0.023  | 0.040 | 0.261 | 0.201 |
| pgf1n.pk001.h17 | NP_055491 | PUM1      | pumilio-like protein 1 [Xenopus laevis]                             | -0.265 | -0.096 | -0.200 | 0.005  | -0.075 | 0.079  | 0.001  | 0.012  | 0.034 | 0.191 | 0.674 |
| ppp2n.pk002.i6  |           |           | vesicle-associated membrane protein 1 [Mus musculus]                | -0.371 | -0.110 | -0.249 | -0.194 | -0.181 | 0.011  | -0.261 | -0.095 | 0.067 | 0.048 | 0.045 |
| ppc1c.pk001.e8  |           |           | Chain A, Ovolactoferrin, N-Terminal Lobe, Apo Form                  | -0.072 | -0.014 | -0.045 | -0.070 | 0.119  | -0.061 | -0.101 | 0.035  | 0.120 | 0.182 | 0.024 |
| pgf1n.pk001.c19 | NP_003583 | CUL1      | similar to cullin protein [Homo sapiens]                            | -0.266 | -0.160 | -0.168 | -0.098 | -0.075 | -0.242 | -0.239 | -0.165 | 0.820 | 0.342 | 0.018 |
| ppp1n.pk010.f6  |           |           | homologous to FPV ORF4                                              | -0.327 | -0.305 | -0.297 | -0.060 | -0.146 | -0.240 | 0.022  | -0.105 | 0.019 | 0.060 | 0.111 |
| pgf1n.pk006.c11 | NP_061850 | NLGN3     | KIAA1480 protein [Homo sapiens]                                     | -0.135 | 0.008  | 0.045  | -0.087 | 0.067  | -0.022 | -0.207 | 0.065  | 0.763 | 0.678 | 0.025 |
| ppp1n.pk008.e20 | NP_003464 | STAM      | signal transducing adaptor molecule 1 [Homo sapiens]                | -0.117 | -0.004 | -0.143 | 0.066  | 0.076  | 0.050  | 0.008  | 0.055  | 0.034 | 0.180 | 0.343 |
| ppp1n.pk005.i24 |           |           | No Hits Found                                                       | -0.095 | -0.037 | -0.143 | -0.018 | 0.097  | -0.068 | 0.036  | -0.113 | 0.059 | 0.465 | 0.005 |
| ppp1n.pk006.i9  | NP_005751 |           | CCAAT-box-binding transcription factor (CCAAT-binding factor) (CBF) | -0.174 | -0.094 | -0.225 | -0.077 | 0.019  | 0.035  | -0.051 | -0.120 | 0.002 | 0.161 | 0.037 |
| ppp2n.pk009.j1  | NP_659440 |           | Unknown (protein for IMAGE:5756168) [Homo sapiens]                  | -0.127 | -0.183 | -0.270 | -0.142 | 0.066  | -0.019 | -0.148 | -0.149 | 0.021 | 0.076 | 0.422 |
| pgf1n.pk001.j10 |           |           | No Hits Found                                                       | -0.195 | -0.197 | -0.149 | 0.034  | -0.001 | -0.056 | 0.024  | -0.040 | 0.050 | 0.393 | 0.270 |
| pgf1n.pk005.a6  | NP_001093 |           | actinin [Gallus gallus]                                             | -0.112 | -0.062 | -0.048 | -0.040 | 0.081  | -0.019 | 0.009  | 0.029  | 0.027 | 0.932 | 0.501 |
| ppp2n.pk002.h11 |           |           | No Hits Found                                                       | -0.165 | -0.038 | -0.147 | -0.156 | 0.029  | 0.037  | 0.081  | -0.056 | 0.050 | 0.759 | 0.848 |
| pnlb.pk0005.d8  |           |           | No Hits Found                                                       | -0.111 | -0.174 | -0.138 | -0.194 | -0.207 | -0.182 | -0.211 | -0.073 | 0.027 | 0.073 | 0.045 |
| ppp2n.pk007.i13 |           |           | No Hits Found                                                       | 0.002  | 0.079  | 0.092  | 0.091  | 0.196  | 0.094  | -0.188 | 0.129  | 0.044 | 0.827 | 0.384 |
| pgm2n.pk006.p12 | NP_001185 |           | No Hits Found                                                       | 0.154  | 0.195  | 0.135  | -0.054 | 0.349  | 0.056  | -0.023 | 0.025  | 0.899 | 0.003 | 0.029 |
| ppp2n.pk006.n15 | NP_073741 | TYSDN1    | RIKEN cDNA 1300019N10 [Mus musculus]                                | -0.047 | 0.011  | -0.008 | -0.147 | 0.147  | -0.052 | -0.154 | 0.040  | 0.235 | 0.098 | 0.005 |
| ppp1n.pk011.e9  | XP_044434 |           | KIAA1458 protein [Homo sapiens]                                     | -0.107 | -0.051 | -0.085 | -0.026 | 0.088  | -0.064 | 0.005  | 0.067  | 0.008 | 0.335 | 0.183 |
| pgm2n.pk011.d8  | NP_001837 | COL4A2    | Unknown (protein for MGC:7371) [Mus musculus]                       | -0.253 | -0.104 | -0.200 | -0.118 | -0.057 | -0.113 | -0.067 | -0.013 | 0.025 | 0.533 | 0.444 |
| ppp2n.pk003.b5  | NP_694940 | IOCK      | hypothetical protein XP_058777 [Homo sapiens]                       | -0.330 | -0.067 | -0.132 | -0.116 | 0.067  | 0.009  | -0.004 | -0.108 | 0.039 | 0.605 | 0.551 |
| ppp2n.pk003.j3  | NP_872384 | ANKRD9    | RIKEN cDNA 1110038F21 [Mus musculus]                                | -0.690 | -0.313 | -0.493 | 0.134  | -0.491 | -0.104 | 0.245  | -0.066 | 0.024 | 0.002 | 0.016 |
| ppp1n.pk010.h24 | NP_054883 |           | No Hits Found                                                       | -0.278 | -0.308 | -0.238 | -0.087 | -0.079 | -0.186 | -0.135 | -0.096 | 0.031 | 0.086 | 0.339 |
| pgf1n.pk002.a19 | NP_037414 | SLC12A4   | ubiquitin-like, containing PHD and RING finger domains, 1           | -0.201 | -0.068 | -0.086 | -0.128 | -0.002 | -0.194 | -0.197 | -0.091 | 0.910 | 0.826 | 0.021 |
| pgf2n.pk001.a5  | NP_005063 | SLC12A4   | solute carrier family 12, member 4 [Rattus norvegicus]              | -0.057 | -0.025 | -0.248 | -0.028 | 0.142  | 0.102  | 0.065  | 0.085  | 0.001 | 0.500 | 0.801 |
| ppp2n.pk007.p22 | NP_056034 | EXOC7     | Unknown (protein for MGC:9876) [Homo sapiens]                       | -0.072 | -0.129 | -0.250 | -0.183 | 0.128  | -0.036 | -0.126 | 0.054  | 0.046 | 0.302 | 0.884 |
| pgf2n.pk002.c16 |           |           | No Hits Found                                                       | -0.213 | -0.185 | -0.202 | -0.194 | -0.013 | -0.195 | -0.192 | -0.115 | 0.031 | 0.158 | 0.048 |
| pgm2n.pk012.i13 | NP_000811 | GAS6      | growth-arrest-specific protein                                      | -0.002 | 0.079  | 0.092  | 0.091  | 0.196  | 0.094  | -0.188 | 0.129  | 0.044 | 0.827 | 0.384 |
| ppp2n.pk006.k14 | XP_370537 |           | No Hits Found                                                       | 0.020  | 0.046  | -0.013 | -0.227 | 0.221  | nd     | -0.050 | 0.071  | 0.020 | 0.027 | 0.108 |
| ppp2n.pk002.i18 | NP_057431 |           | putative N-acetyltransferase Camello 4 [Rattus norvegicus]          | -0.372 | -0.183 | -0.285 | 0.107  | -0.171 | -0.003 | 0.143  | 0.102  | 0.035 | 0.055 | 0.422 |
| ppp2n.pk009.i18 | NP_056422 | C1orf77   | unamed protein product [Mus musculus]                               | -0.152 | -0.152 | -0.191 | 0.045  | 0.050  | -0.062 | -0.017 | -0.007 | 0.033 | 0.217 | 0.249 |
| pgm2n.pk008.a22 | NP_001842 |           | collagen alpha 1(I)X chain long form precursor - chicken            | -0.123 | -0.028 | -0.063 | 0.015  | 0.079  | 0.076  | 0.085  | 0.106  | 0.045 | 0.838 | 0.928 |
| pgm2n.pk005.i8  | NP_002685 | POLR2C    | Similar to polymerase (RNA) II (DNA directed) polypeptide C         | -0.218 | -0.112 | -0.197 | -0.012 | -0.015 | 0.000  | 0.007  | -0.041 | 0.015 | 0.524 | 0.243 |
| pgf1n.pk004.p10 | NP_061489 | EFEMP1    | extracellular protein - human                                       | -0.334 | -0.141 | -0.279 | -0.288 | -0.132 | -0.313 | -0.313 | -0.071 | 0.282 | 0.374 | 0.033 |
| pgf2c.pk001.f6  | NP_064706 | MNT       | max binding protein [Mus musculus]                                  | -0.457 | -0.219 | -0.233 | -0.063 | -0.254 | -0.284 | -0.053 | -0.065 | 0.031 | 0.000 | 0.030 |
| ppp1n.pk002.i13 | NP_006822 | CLP1      | ATP/GTP-binding protein [Homo sapiens]                              | -0.278 | -0.281 | -0.199 | -0.023 | -0.075 | -0.102 | 0.012  | -0.076 | 0.019 | 0.216 | 0.267 |
| pgf1n.pk014.i5  |           |           | No Hits Found                                                       | -0.154 | -0.108 | -0.109 | -0.099 | 0.049  | -0.120 | -0.118 | 0.007  | 0.040 | 0.303 | 0.085 |
| ppp1n.pk003.i11 |           |           | No Hits Found                                                       | 0.008  | 0.056  | -0.026 | 0.034  | 0.211  | 0.023  | 0.041  | 0.192  | 0.007 | 0.085 | 0.080 |
| ppp1n.pk004.m9  |           |           | No Hits Found                                                       | -0.268 | -0.131 | -0.285 | 0.034  | -0.063 | 0.009  | -0.041 | -0.008 | 0.038 | 0.158 | 0.407 |
| ppp2n.pk003.k10 | NP_077719 | NOTCH2    | Notch2 [Gallus gallus]                                              | -0.001 | 0.072  | 0.021  | -0.024 | 0.205  | 0.058  | -0.025 | 0.073  | 0.072 | 0.31  | 0.039 |
| ppp2n.pk005.i15 | NP_003350 |           | UDP-glucose dehydrogenase [Mus musculus]                            | 0.023  | 0.090  | -0.143 | -0.100 | 0.229  | 0.016  | -0.047 | 0.067  | 0.044 | 0.037 | 0.099 |
| pgf1n.pk008.k21 |           |           | HMG CoA synthase                                                    | -0.154 | -0.027 | 0.031  | -0.109 | 0.051  | -0.126 | -0.183 | -0.020 | 0.926 | 0.980 | 0.022 |
| ppp2n.pk008.o15 |           |           | No Hits Found                                                       | 0.061  | -0.085 | 0.004  | 0.053  | 0.269  | -0.122 | -0.011 | 0.014  | 0.424 | 0.000 | 0.039 |
| ppp1c.pk002.i13 | NP_078863 | TMEM53    | hypothetical protein FLJ22353 [Homo sapiens]                        | -0.341 | -0.530 | -0.395 | -0.176 | -0.132 | -0.281 | -0.031 | -0.088 | 0.044 | 0.382 | 0.776 |
| pgf2n.pk001.g10 | NP_004070 | CTSS      | cathepsin S [Homo sapiens]                                          | -0.041 | 0.039  | 0.019  | -0.053 | 0.168  | 0.016  | -0.005 | -0.012 | 0.072 | 0.154 | 0.343 |
| pgf1n.pk007.p20 | NP_006107 | MAP3K71P1 | transforming growth factor beta-activated kinase-binding protein 1  | -0.226 | -0.041 | -0.271 | -0.021 | -0.016 | 0.032  | 0.114  | 0.056  | 0.009 | 0.379 | 0.032 |
| pgm2n.pk007.n5  | NP_057211 | TMEM66    | similar to FOAP-7 [Homo sapiens]                                    | -0.197 | -0.178 | -0.158 | 0.025  | 0.013  | -0.120 | 0.047  | -0.020 | 0.045 | 0.    |       |

|                 |           |                                                                             |        |        |        |        |        |        |        |        |       |       |       |
|-----------------|-----------|-----------------------------------------------------------------------------|--------|--------|--------|--------|--------|--------|--------|--------|-------|-------|-------|
| pgf1n.pk010.o17 |           | No Hits Found                                                               | -0.429 | -0.310 | -0.200 | 0.133  | -0.193 | -0.130 | -0.060 | -0.020 | 0.046 | 0.000 | 0.035 |
| pgp1n.pk001.h20 | XP_370993 | similar to coenzyme A diphosphatase [Homo sapiens]                          | -0.234 | -0.185 | -0.259 | -0.198 | 0.003  | -0.131 | -0.149 | -0.049 | 0.023 | 0.668 | 0.705 |
| pgm2n.pk003.d8  | NP_932342 | RIKEN cDNA 2310005N03 [Mus musculus]                                        | 0.095  | 0.145  | 0.087  | -0.018 | 0.332  | -0.005 | -0.045 | 0.041  | 0.940 | 0.034 | 0.037 |
| pgf2n.pk001.a6  | NP_055835 | PHLPLP similar to hypothetical protein [Macaca fascicularis] [Homo sapiens] | -0.132 | -0.145 | -0.094 | -0.150 | 0.105  | -0.193 | -0.164 | -0.132 | 0.286 | 0.009 | 0.008 |
| pgf1n.pk010.a6  | NP_056049 | similar to dj365012.1 (KIAA0758 protein) [Homo sapiens]                     | -0.090 | -0.038 | -0.121 | -0.021 | 0.147  | 0.046  | -0.035 | 0.061  | 0.045 | 0.538 | 0.664 |
| pgp1n.pk007.c21 | NP_000023 | ALAS2 5-AMINOLEVULINIC ACID SYNTHASE, ERYTHROID-SPECIFIC                    | -0.141 | -0.111 | -0.193 | -0.036 | 0.099  | -0.154 | 0.005  | -0.023 | 0.049 | 0.340 | 0.144 |
| pgp2n.pk002.n11 | NP_001767 | No Hits Found                                                               | -0.443 | -0.229 | -0.259 | -0.015 | -0.203 | -0.147 | 0.093  | -0.066 | 0.016 | 0.020 | 0.104 |
| pgf1n.pk003.p8  | NP_001767 | ATP synthase beta chain, mitochondrial precursor                            | -0.313 | -0.202 | -0.341 | -0.141 | -0.072 | -0.019 | -0.182 | -0.133 | 0.016 | 0.211 | 0.558 |
| pnfb.pk0003.c1  | NP_004346 | MHC class II-associated invariant chain [Gallus gallus]                     | -0.285 | -0.127 | 0.022  | 0.169  | -0.042 | 0.019  | 0.080  | 0.001  | 0.063 | 0.000 | 0.003 |
| pgp1n.pk003.h2  | NP_056195 | NAM5M0 Chromosome CG1-51                                                    | -0.348 | -0.027 | 0.037  | 0.268  | -0.103 | 0.264  | 0.546  | 0.281  | 0.018 | 0.009 | 0.445 |
| pgm2n.pk007.e15 | NP_056880 | No Hits Found                                                               | -0.242 | -0.151 | -0.216 | -0.051 | 0.004  | -0.133 | -0.097 | -0.127 | 0.013 | 0.371 | 0.003 |
| pgm2n.pk006.n15 | NP_056880 | NCAPD2 chromsome condensation-related SMC-associated protein 1              | 0.114  | 0.166  | 0.084  | -0.012 | 0.361  | -0.017 | -0.052 | 0.088  | 0.901 | 0.036 | 0.040 |
| pgm2n.pk010.n12 | NP_056880 | No Hits Found                                                               | -0.133 | -0.087 | -0.120 | -0.052 | 0.114  | -0.036 | -0.063 | -0.022 | 0.010 | 0.345 | 0.092 |
| pgf1n.pk002.j12 | NP_056880 | No Hits Found                                                               | -0.253 | -0.138 | -0.190 | -0.145 | -0.006 | -0.232 | -0.026 | -0.133 | 0.173 | 0.222 | 0.002 |
| pgp1n.pk014.j24 | NP_006328 | target of Jun 3 [Cutormix cutormix]                                         | -0.381 | -0.231 | -0.420 | -0.175 | -0.133 | -0.180 | -0.245 | -0.129 | 0.049 | 0.254 | 0.590 |
| pgp2n.pk002.c19 | NP_057055 | MRPS7 mitochondrial ribosomal protein S7 [Mus musculus]                     | -0.094 | -0.041 | -0.075 | -0.047 | 0.154  | -0.063 | -0.146 | -0.020 | 0.048 | 0.073 | 0.078 |
| pgf2n.pk006.b16 | NP_036513 | ORC3L origin recognition complex, subunit 3 (yeast homolog)-like            | -0.341 | -0.151 | -0.371 | -0.076 | -0.093 | -0.149 | -0.048 | -0.156 | 0.036 | 0.445 | 0.042 |
| pgf1n.pk007.c23 | NP_002957 | S100A10 Calpain1 I light chain (P10 protein) (P11)                          | -0.734 | -0.588 | -0.375 | -0.047 | -0.485 | -0.152 | -0.096 | -0.093 | 0.027 | 0.008 | 0.317 |
| pgm2n.pk005.p24 | NP_060853 | C1orf212 hypothetical protein BC011880 [Homo sapiens]                       | -0.222 | -0.258 | -0.354 | -0.304 | 0.029  | -0.165 | -0.199 | -0.176 | 0.002 | 0.039 | 0.524 |
| pgp1c.pk003.g7  | NP_002399 | No Hits Found                                                               | -0.402 | -0.413 | -0.322 | -0.098 | -0.150 | -0.213 | -0.054 | -0.156 | 0.017 | 0.200 | 0.275 |
| pgf2n.pk002.b3  | NP_002399 | alpha-1,6-mannosyl-glycoprotein beta-1,2-N-acetylglucosaminyltransferase    | -0.121 | 0.017  | -0.132 | 0.198  | 0.132  | 0.087  | 0.112  | 0.112  | 0.047 | 0.207 | 0.148 |
| pgp2n.pk004.a23 | NP_000814 | VIPR1 Growth hormone-releasing hormone receptor precursor (GHRH receptor)   | -0.197 | -0.194 | -0.187 | -0.101 | 0.058  | -0.171 | 0.011  | -0.087 | 0.013 | 0.302 | 0.164 |
| pgf1n.pk001.o17 | NP_006639 | similar to Heat shock protein HSP 90-alpha (HSP 86) [Homo sapiens]          | -0.243 | -0.325 | -0.370 | -0.161 | 0.012  | -0.221 | -0.187 | -0.034 | 0.018 | 0.090 | 0.737 |
| pgm2n.pk011.l14 | XP_032181 | ADAMTSL3 similar to thrombospondin like [Homo sapiens]                      | -0.354 | -0.321 | -0.388 | -0.110 | -0.097 | -0.095 | -0.095 | -0.175 | 0.034 | 0.564 | 0.086 |
| pgf2n.pk002.h3  | NP_055976 | ARL6IP1 ADP-ribosylation-like factor 6 interacting protein [Mus musculus]   | -0.197 | -0.226 | -0.284 | -0.050 | 0.060  | -0.055 | -0.092 | -0.179 | 0.030 | 0.434 | 0.744 |
| pcoc1c.pk001.p9 | NP_892009 | helicase [Homo sapiens]                                                     | -0.182 | -0.179 | -0.162 | 0.038  | 0.075  | -0.058 | -0.085 | -0.046 | 0.033 | 0.594 | 0.814 |
| pgp2n.pk003.d14 | NP_061847 | UNC93A BC0NA:GH10120 gene product [Drosophila melanogaster]                 | -0.160 | -0.120 | -0.102 | -0.126 | 0.100  | -0.173 | -0.079 | -0.029 | 0.017 | 0.114 | 0.014 |
| pgp1n.pk006.f7  | NP_003370 | VIL2 ezrin [Gallus gallus]                                                  | -0.221 | -0.237 | -0.297 | -0.164 | 0.039  | -0.255 | -0.180 | 0.007  | 0.016 | 0.042 | 0.264 |
| pgf1n.pk012.d17 | NP_659494 | JUND proline-rich protein - mouse (fragment)                                | -0.173 | -0.157 | -0.149 | -0.003 | 0.088  | -0.205 | -0.135 | -0.087 | 0.327 | 0.027 | 0.020 |
| pgf1n.pk007.n6  | NP_064695 | No Hits Found                                                               | -0.013 | 0.075  | 0.033  | 0.218  | 0.248  | 0.147  | 0.148  | 0.089  | 0.064 | 0.747 | 0.023 |
| pgm2n.pk012.p16 | NP_064695 | AKR1B10 aldo-keto reductase [Gallus gallus]                                 | -0.327 | -0.328 | -0.367 | -0.193 | -0.064 | -0.296 | -0.136 | 0.061  | 0.014 | 0.125 | 0.663 |
| pgf2n.pk001.e22 | NP_835227 | FAM134C similar to RIKEN cDNA 1300010N03 [Homo sapiens]                     | -0.069 | 0.023  | -0.036 | 0.043  | 0.184  | 0.042  | -0.153 | 0.044  | 0.184 | 0.030 | 0.340 |
| pgf2n.pk005.g6  | NP_004721 | ETF1 eukaryotic translation termination factor 1 [Homo sapiens]             | -0.266 | -0.030 | -0.087 | -0.089 | 0.198  | -0.097 | -0.124 | -0.045 | 0.196 | 0.021 | 0.023 |
| pgf1n.pk012.c5  | NP_870988 | No Hits Found                                                               | -0.069 | -0.234 | -0.248 | -0.058 | -0.001 | -0.063 | -0.083 | -0.060 | 0.003 | 0.351 | 0.181 |
| pgp1n.pk005.a17 | NP_870988 | hypothetical protein XP_110476 [Mus musculus]                               | -0.549 | -0.206 | -0.228 | 0.130  | -0.280 | 0.060  | 0.198  | 0.124  | 0.039 | 0.013 | 0.574 |
| pgm2n.pk012.e21 | NP_055984 | No Hits Found                                                               | -0.292 | -0.210 | -0.424 | -0.130 | -0.022 | -0.232 | -0.191 | -0.283 | 0.148 | 0.260 | 0.033 |
| pgp2n.pk002.j13 | NP_055984 | KIAA0112 [Homo sapiens]                                                     | -0.486 | -0.179 | -0.361 | -0.132 | -0.215 | 0.073  | -0.045 | 0.100  | 0.029 | 0.179 | 0.995 |
| pgp1n.pk006.c7  | NP_006463 | TXNIP VDUP1 [Homo sapiens]                                                  | -0.070 | 0.016  | 0.033  | -0.049 | 0.202  | 0.092  | -0.030 | 0.041  | 0.016 | 0.382 | 0.026 |
| pgf1n.pk009.c24 | XP_370782 | IG gamma chain (clone 36) - chicken (fragment)                              | -0.222 | -0.116 | -0.126 | -0.029 | 0.050  | -0.174 | -0.107 | -0.113 | 0.389 | 0.621 | 0.027 |
| pgp1n.pk002.h9  | NP_037366 | EIF3S12 muscle specific gene [Homo sapiens]                                 | -0.417 | -0.268 | -0.383 | 0.015  | -0.145 | -0.067 | 0.090  | -0.027 | 0.013 | 0.179 | 0.196 |
| pgm1c.pk001.f22 | NP_803883 | putative serine taste receptor T1R1 [Mus musculus]                          | -0.281 | -0.171 | -0.254 | -0.144 | -0.008 | -0.277 | -0.110 | -0.220 | 0.386 | 0.354 | 0.007 |
| pgm2n.pk011.p9  | NP_077728 | NADPH:adrenodoxin oxidoreductase, mitochondrial precursor                   | -0.324 | -0.139 | -0.326 | -0.101 | -0.051 | -0.071 | 0.013  | -0.072 | 0.002 | 0.416 | 0.104 |
| pgf2n.pk004.p11 | XP_374604 | T cell receptor gamma                                                       | -0.032 | 0.086  | 0.128  | -0.079 | 0.241  | 0.002  | -0.059 | 0.075  | 0.414 | 0.468 | 0.008 |
| pgf1n.pk004.h16 | NP_004860 | SKO1 [Mus musculus]                                                         | -0.322 | -0.258 | -0.273 | -0.100 | 0.223  | -0.190 | -0.175 | -0.162 | 0.003 | 0.371 | 0.180 |
| pgf2n.pk004.g15 | NP_001815 | CKM CREATINE KINASE, M CHAIN (M-CK)                                         | -0.307 | -0.197 | -0.379 | -0.080 | -0.032 | -0.129 | -0.089 | -0.129 | 0.029 | 0.493 | 0.179 |
| pgf1n.pk002.h16 | NP_055026 | GABRP gamma-aminobutyric acid (GABA) A receptor, pi [Homo sapiens]          | -0.099 | -0.054 | -0.086 | 0.091  | 0.178  | 0.048  | 0.049  | -0.045 | 0.035 | 0.761 | 0.015 |
| pf1c.pk002.b4   | NP_055944 | septin 6 isoform B [Homo sapiens]                                           | -0.176 | -0.021 | -0.107 | -0.140 | 0.101  | -0.146 | -0.149 | -0.065 | 0.295 | 0.540 | 0.027 |
| pgm2n.pk013.f23 | NP_705842 | EMP1 No Hits Found                                                          | -0.465 | -0.296 | -0.150 | -0.118 | -0.186 | -0.251 | -0.464 | -0.083 | 0.858 | 0.104 | 0.096 |
| pgf1n.pk003.d9  | NP_005868 | heat shock protein 40 [Ciona intestinalis]                                  | -0.296 | -0.147 | -0.289 | -0.033 | -0.017 | -0.074 | -0.046 | -0.106 | 0.022 | 0.526 | 0.033 |
| pgf2n.pk004.h17 | XP_371707 | splicing factor 3a, subunit 1, 120kDa [Homo sapiens]                        | -0.553 | -0.452 | -0.410 | 0.043  | -0.271 | 0.018  | 0.065  | -0.157 | 0.035 | 0.217 | 0.131 |
| pf1c.pk002.f5   | NP_387448 | UTP15 unnamed protein product [Homo sapiens]                                | -0.183 | -0.188 | -0.178 | -0.044 | 0.098  | -0.150 | -0.086 | -0.047 | 0.009 | 0.047 | 0.049 |
| pgf2n.pk001.c14 | NP_115825 | CC2D1B KIAA1836 protein [Homo sapiens]                                      | -0.033 | -0.191 | -0.190 | -0.395 | 0.249  | 0.010  | -0.093 | -0.114 | 0.003 | 0.007 | 0.649 |
| pgf1n.pk010.o14 | NP_060220 | PENK pronenkephalin [Homo sapiens]                                          | -0.552 | -0.331 | -0.229 | -0.078 | -0.270 | -0.084 | -0.005 | -0.037 | 0.001 | 0.001 | 0.263 |
| pgp2n.pk008.p5  | NP_060220 | MRRF RIKEN cDNA 2400002D02 [Mus musculus]                                   | -0.126 | -0.416 | -0.245 | -0.039 | 0.059  | 0.153  | nd     | -0.027 | 0.049 | 0.943 | 0.276 |
| pgf1n.pk003.n11 | NP_620132 | MIRRF NIN adenyltransferase [Mus musculus]                                  | -0.112 | 0.151  | 0.157  | 0.057  | 0.397  | 0.129  | 0.114  | 0.167  | 0.044 | 0.095 | 0.033 |
| pgp2n.pk005.c11 | NP_073824 | NINAT1 IAP homolog [Gallus gallus]                                          | -0.062 | -0.465 | -0.726 | -0.315 | 0.223  | -0.190 | -0.175 | -0.162 | 0.003 | 0.431 | 0.180 |
| pgm2n.pk006.o12 | NP_001157 | BIRC2 hypothetical protein FLJ13657 [Homo sapiens]                          | -0.022 | 0.109  | -0.017 | 0.171  | 0.264  | 0.147  | 0.244  | -0.150 | 0.039 | 0.954 | 0.246 |
| pgf1n.pk009.l5  | NP_079104 | CborB2 Similar to four and a half LIM domains 3 [Homo sapiens]              | -0.265 | 0.013  | -0.195 | 0.049  | 0.023  | -0.034 | 0.065  | 0.039  | 0.034 | 0.189 | 0.073 |
| pgf1n.pk003.p2  | NP_004459 | FHL3 No Hits Found                                                          | -0.266 | -0.185 | -0.270 | -0.030 | 0.023  | -0.129 | -0.075 | -0.063 | 0.027 | 0.368 | 0.169 |
| pgm2n.pk006.a3  | NP_064530 | SH3GLB2 SH3-containing protein SH3GLB2 [Mus musculus]                       | -0.268 | -0.144 | -0.238 | -0.044 | 0.021  | -0.160 | -0.195 | -0.149 | 0.235 | 0.231 | 0.025 |
| pgf1n.pk001.a12 | NP_071942 | MRPS25 FLJ00023 protein [Homo sapiens]                                      | -0.156 | -0.053 | -0.162 | 0.053  | 0.133  | 0.149  | 0.001  | 0.006  | 0.027 | 0.458 | 0.334 |
| pgm2n.pk008.b13 | NP_001859 | CPA1 lacZ alpha peptide                                                     | -0.281 | -0.226 | -0.298 | -0.095 | 0.010  | -0.119 | -0.054 | -0.079 | 0.027 | 0.792 | 0.480 |
| pnfb.pk0002.d5  | NP_787103 | ZADH2 similar to NADPH oxidoreductase homolog [Homo sapiens]                | -0.459 | -0.245 | -0.058 | 0.026  | -0.165 | -0.109 | -0.092 | -0.027 | 0.072 | 0.002 | 0.049 |
| pgf1n.pk008.j23 | NP_055467 | IPO13 importin 13 [Homo sapiens]                                            | 0.001  | 0.020  | 0.040  | 0.049  | 0.298  | 0.035  | 0.114  | 0.054  | 0.007 | 0.148 | 0.052 |
| pgm2n.pk014.e16 | NP_001859 | CPA1 preprocarboxypeptidase A [Gallus gallus]                               | -0.384 | -0.071 | -0.273 | -0.093 | -0.084 | -0.003 | -0.075 | -0.030 | 0.046 | 0.227 | 0.625 |
| pgf1n.pk008.i10 | NP_003272 | TNNI1 tropomyosin I slow skeletal muscle isoform                            | -0.355 | -0.316 | -0.415 | -0.181 | -0.054 | -0.300 | -0.233 | -0.155 | 0.006 | 0.041 | 0.095 |
| pgm2n.pk005.p14 | NP_008964 | RER1 RIKEN cDNA 1110080F11 [Mus musculus]                                   | -0.058 | -0.005 | 0.011  | 0.110  | 0.245  | 0.079  | 0.064  | 0.089  | 0.046 | 0.691 | 0.143 |
| pgf2n.pk005.e12 | NP_005915 | MEOX2 MX2-2 protein [Gallus gallus]                                         | 0.134  | 0.146  | 0.024  | -0.002 | 0.437  | -0.014 | -0.024 | 0.028  | 0.567 | 0.007 | 0.040 |
| pgf2n.pk001.b3  | NP_005915 | No Hits Found                                                               | -0.138 | 0.021  | -0.175 | -0.036 | 0.166  | -0.039 | -0.115 | 0.003  | 0.069 | 0.091 | 0.048 |
| pgp2n.pk005.a17 | NP_892118 | Unknown (protein for MGC:37636) [Mus musculus]                              | -0.133 | -0.    |        |        |        |        |        |        |       |       |       |



**Supplemental Table 3a. The number of up-regulated and down-regulated genes in the FL and LL at week 1 or week 3, according to GO biological process**

| Line                          | Up-regulated |      | Down-regulated |      |
|-------------------------------|--------------|------|----------------|------|
|                               | Wk 1         | Wk 3 | Wk 1           | Wk 3 |
| <u>FL vs. LL</u>              | 427          | 321  | 325            | 144  |
| Transcription – DNA dependent | 31           | 22   | 19             | 12   |
| signal transduction           | 29           | 18   | 15             | 6    |
| transcription                 | 24           | 17   | 15             | 11   |
| protein biosynthesis          | 12           | 12   | 17             | 2    |
| transport                     | 15           | 9    | 15             | 10   |
| biological process unknown    | 17           | 4    | 11             | 9    |
| metabolism                    | 9            | 4    | 10             | 2    |
| carbohydrate metabolism       | 4            | 5    | 4              | 1    |
| lipid metabolism              | 5            | 4    | 4              | 2    |
| glycolysis                    | 0            | 4    | 5              | 0    |

\*Gene numbers represent genes obtained using a P-value < 0.05.

**Supplemental Table 3b. The number of up-regulated and down-regulated genes in the FL and LL at week 5 or week 7, according to GO biological process**

| Line                          | Up-regulated |      | Down-regulated |      |
|-------------------------------|--------------|------|----------------|------|
|                               | Wk 5         | Wk 7 | Wk 5           | Wk 7 |
| <u>FL vs. LL</u>              | 372          | 160  | 266            | 223  |
| Transcription – DNA dependent | 23           | 11   | 17             | 15   |
| signal transduction           | 24           | 7    | 10             | 11   |
| protein biosynthesis          | 8            | 3    | 11             | 12   |
| transport                     | 14           | 10   | 13             | 9    |
| biological process unknown    | 12           | 9    | 10             | 9    |
| metabolism                    | 5            | 5    | 10             | 4    |
| carbohydrate metabolism       | 6            | 4    | 3              | 3    |
| lipid metabolism              | 5            | 4    | 3              | 2    |
| glycolysis                    | 2            | 0    | 3              | 4    |

\*Gene numbers represent genes obtained using a P-value < 0.05.

Supplemental Table 4. Differentially expressed genes specifically expressed in neurons, astrocytes or oligodendrocytes.

| <b>Neuron</b> | <b>Astrocyte</b> | <b>Oligo</b> |
|---------------|------------------|--------------|
| PPA1          | TM9SF2           | ERO1L        |
| NEFL          | SLC12A4          | SEPT8        |
| MAPK1         | PPIG             | TPM1         |
| ATP1A3        | PVGB             | TIMP2        |
| VSNL1         | SPAG1            | ZYX          |
| CDC42         | FDXR             | YIF1A        |
| EGFL7         | AGT              | TXNL1        |
| STMN1         | ANAPC2           | CYP27A1      |
| ATP10A        | AIFM1            | PKP4         |
| TUBB5         | SEC14L2          | ADH1         |
| SULT4A1       | PITRM1           | ENPP3        |
| GAP43         | CFLAR            | CDYL         |
| HN1           | ANK2             |              |
| PCBP2         | SRC              |              |
| TPM3          | OGT              |              |
| GLE1          | DUSP1            |              |
| TUBB3         | DUSP6            |              |
| CHGB          | FGFR3            |              |
| ATP1A3        | PLA2G3           |              |
| SPOCK2        | HSD17B4          |              |
|               | HSPA4            |              |
|               | AHCYL1           |              |
|               | ARID5A           |              |
|               | AGFBP2           |              |

Supplemental Table 5. Gene Ontology (GO) analysis for cluster 17

| Biological Process                        | # of Genes | Gene Name                                            |
|-------------------------------------------|------------|------------------------------------------------------|
| Protein Biosynthesis                      | 5          | Seryl-tRNA synthetase                                |
|                                           |            | <b>Eukaryotic translation EF1<math>\alpha</math></b> |
|                                           |            | Ribosomal protein L17                                |
|                                           |            | Ribosomal protein L35A                               |
| Regulation of transcription DNA dependent | 5          | Ribosomal protein L26                                |
|                                           |            | non-POU domain containing                            |
|                                           |            | Calreticulin                                         |
|                                           |            | multiple endocrine neoplasia 1                       |
| G-protein receptor Signaling              | 3          | PQBP-1b/c                                            |
|                                           |            | TSC-22                                               |
|                                           |            | G protein-coupled receptor 123                       |
| Proteolysis                               | 2          | Amyloid-like protein 2 precursor                     |
|                                           |            | tubulin beta 3                                       |
| Protein Polymerization                    | 3          | <i>ADAM 12</i>                                       |
|                                           |            | F-box only protein 3                                 |
|                                           |            | tubulin alpha 1                                      |
| Protein Folding                           | 2          | tubulin beta 3                                       |
|                                           |            | tubulin beta 5                                       |
| Glycolysis                                | 2          | Calreticulin                                         |
|                                           |            | Calnexin                                             |
| Carbohydrate Metabolism                   | 1          | <b>Phosphoglycerate mutase 1</b>                     |
| Metabolism                                | 3          | <b>Neural enolase</b>                                |
|                                           |            | <i>Klotho secreted isoform</i>                       |
|                                           |            | Phospholipid-transporting ATPase                     |
| Intracellular protein transport           | 3          | Retinol dehydrogenase 11                             |
|                                           |            | Golgi SNAP receptor complex                          |
|                                           |            | <b>Soluble NSF-attachment protein alpha</b>          |
| Cell adhesion                             | 3          | adaptor-related protein complex 2                    |
|                                           |            | <i>ADAM 12</i>                                       |
|                                           |            | Beta-amyloid precursor protein                       |
| Microtubule-based movement                | 3          | Glucose Regulated Protein, 95-KD (Grp94)             |
|                                           |            | tubulin alpha 1                                      |
|                                           |            | tubulin beta 3                                       |
|                                           |            | tubulin beta 5                                       |

**Bold** denotes qPCR verification for microarray data. *Italic* denotes a homologues gene associated with the development of obesity.

| Supplemental Table 6                                |           |           |
|-----------------------------------------------------|-----------|-----------|
| Pathway Name                                        | Gene Name | Accession |
| <b>KEGG</b>                                         |           |           |
| Glycolysis / Gluconeogenesis                        |           |           |
|                                                     | ENO2      | NP_001966 |
|                                                     | PGK1      | NP_000282 |
|                                                     | HK1       | NP_000179 |
|                                                     | GPI       | NP_000166 |
|                                                     | PGAM1     | NP_002620 |
| ATP synthesis                                       |           |           |
|                                                     | ATP6V1B2  | NP_001684 |
|                                                     | ATP6V1C1  | NP_001686 |
| Starch and sucrose metabolism                       |           |           |
|                                                     | HK1       | NP_000179 |
|                                                     | GPI       | NP_000166 |
| Oxidative phosphorylation                           |           |           |
|                                                     | ATP6V1B2  | NP_001684 |
|                                                     | ATP6V1C1  | NP_001686 |
| Glycine, serine and threonine metabolism            |           |           |
|                                                     | SARS      | NP_006504 |
|                                                     | PHGDH     | NP_006614 |
| Nicotinate and nicotinamide metabolism              |           |           |
|                                                     | NMNAT1    | NP_073624 |
| Pyrimidine metabolism                               |           |           |
|                                                     | POLE      | NP_006222 |
| Metabolism of xenobiotics by cytochrome P450        |           |           |
|                                                     | GSTA5     | NP_714543 |
| Glycerophospholipid metabolism                      |           |           |
|                                                     | PCYT1A    | NP_005008 |
| Carbon fixation                                     |           |           |
|                                                     | PGK1      | NP_000282 |
| Aminosugars metabolism                              |           |           |
|                                                     | HK1       | NP_000179 |
| Pentose phosphate pathway                           |           |           |
|                                                     | GPI       | NP_000166 |
| Aminophosphonate metabolism                         |           |           |
|                                                     | PCYT1A    | NP_005008 |
| Phenylalanine, tyrosine and tryptophan biosynthesis |           |           |
|                                                     | ENO2      | NP_001966 |
| Glycosphingolipid metabolism                        |           |           |
|                                                     | SPHK1     | NP_068807 |
| Selenoamino acid metabolism                         |           |           |
|                                                     | SEPHS2    | NP_036380 |
| Galactose metabolism                                |           |           |
|                                                     | HK1       | NP_000179 |
| Fructose and mannose metabolism                     |           |           |
|                                                     | HK1       | NP_000179 |
| Streptomycin biosynthesis                           |           |           |
|                                                     | HK1       | NP_000179 |
| Purine metabolism                                   |           |           |

|                                           |          |           |
|-------------------------------------------|----------|-----------|
|                                           | POLE     | NP_006222 |
| Glutathione metabolism                    |          |           |
|                                           | GSTA5    | NP_714543 |
| Cholera - Infection                       |          |           |
|                                           | ATP6V1C1 | NP_001686 |
|                                           | ERO1L    | NP_055399 |
| Wnt signaling pathway                     |          |           |
|                                           | FBXW11   | NP_387448 |
|                                           | PPP2CB   | NP_004147 |
| Antigen processing and presentation       |          |           |
|                                           | CALR     | NP_004334 |
|                                           | CANX     | NP_001737 |
| MAPK signaling pathway                    |          |           |
|                                           | STMN1    | NP_005554 |
|                                           | IL1B     | NP_000567 |
| Gap junction                              |          |           |
|                                           | TUBB     | NP_821133 |
|                                           | TUBB3    | NP_006077 |
| Toll-like receptor signaling pathway      |          |           |
|                                           | IL1B     | NP_000567 |
| Axon guidance                             |          |           |
|                                           | DPYSL2   | NP_001377 |
| Cell cycle                                |          |           |
|                                           | YWHAG    | NP_036611 |
| Focal adhesion                            |          |           |
|                                           | COL3A1   | NP_000081 |
| Neurodegenerative Disorders               |          |           |
|                                           | APP      | NP_958816 |
| TGF-beta signaling pathway                |          |           |
|                                           | PPP2CB   | NP_004147 |
| VEGF signaling pathway                    |          |           |
|                                           | SPHK1    | NP_068807 |
| Ubiquitin mediated proteolysis            |          |           |
|                                           | FBXW11   | NP_387448 |
| Ribosome                                  |          |           |
|                                           | RPL7A    | NP_000963 |
| Hematopoietic cell lineage                |          |           |
|                                           | IL1B     | NP_000567 |
| DNA polymerase                            |          |           |
|                                           | POLE     | NP_006222 |
| Type II diabetes mellitus                 |          |           |
|                                           | ABCC8    | NP_000343 |
| SNARE interactions in vesicular transport |          |           |
|                                           | GOSR1    | NP_004862 |
| Long-term depression                      |          |           |
|                                           | PPP2CB   | NP_004147 |
| Proteasome                                |          |           |
|                                           | PSMB6    | NP_002789 |
| Tight junction                            |          |           |
|                                           | PPP2CB   | NP_004147 |
| ABC transporters - General                |          |           |
|                                           | ABCC8    | NP_000343 |

|                                                                        |         |           |
|------------------------------------------------------------------------|---------|-----------|
| Cytokine-cytokine receptor interaction                                 |         |           |
|                                                                        | IL1B    | NP_000567 |
| Apoptosis                                                              |         |           |
|                                                                        | IL1B    | NP_000567 |
| Aminoacyl-tRNA biosynthesis                                            |         |           |
|                                                                        | SARS    | NP_006504 |
| ECM-receptor interaction                                               |         |           |
|                                                                        | COL3A1  | NP_000081 |
| Alzheimer's disease                                                    |         |           |
|                                                                        | APP     | NP_958816 |
| Type I diabetes mellitus                                               |         |           |
|                                                                        | IL1B    | NP_000567 |
| Hedgehog signaling pathway                                             |         |           |
|                                                                        | FBXW11  | NP_387448 |
| Calcium signaling pathway                                              |         |           |
|                                                                        | SPHK1   | NP_068807 |
| Cell Communication                                                     |         |           |
|                                                                        | COL3A1  | NP_000081 |
|                                                                        |         |           |
| <b>BIOCARTA</b>                                                        |         |           |
| Glycolysis Pathway                                                     |         |           |
|                                                                        | PGK1    | NP_000282 |
|                                                                        | HK1     | NP_000179 |
|                                                                        | GPI     | NP_000166 |
|                                                                        | PGAM1   | NP_002620 |
| Feeder Pathways for Glycolysis                                         |         |           |
|                                                                        | HK1     | NP_000179 |
| Biosynthesis of Cysteine in mammals                                    |         |           |
|                                                                        | PHGDH   | NP_006614 |
| Malate-aspartate shuttle                                               |         |           |
|                                                                        | SLC25A1 | NP_005975 |
| Phosphatidylcholine Biosynthesis Pathway                               |         |           |
|                                                                        | PCYT1A  | NP_005008 |
| Shuttle for transfer of acetyl groups from mitochondria to the cytosol |         |           |
|                                                                        | SLC25A1 | NP_005975 |
| Biosynthesis of Glycine and Serine                                     |         |           |
|                                                                        | PHGDH   | NP_006614 |
| NFAT and Hypertrophy of the heart (Transcription in the broken heart)  |         |           |
|                                                                        | CALR    | NP_004334 |
|                                                                        | AGT     | NP_000020 |
| Inhibition of Matrix Metalloproteinases                                |         |           |
|                                                                        | TIMP2   | NP_003246 |
| Msp/Ron Receptor Signaling Pathway                                     |         |           |
|                                                                        | IL1B    | NP_000567 |
| Bioactive Peptide Induced Signaling Pathway                            |         |           |
|                                                                        | AGT     | NP_000020 |
| Phospholipids as signalling intermediaries                             |         |           |
|                                                                        | SPHK1   | NP_068807 |
| Generation of amyloid b-peptide by PS1                                 |         |           |
|                                                                        | APP     | NP_958816 |

|                                                                                |         |           |
|--------------------------------------------------------------------------------|---------|-----------|
| Angiotensin-converting enzyme 2 regulates heart function                       |         |           |
|                                                                                | AGT     | NP_000020 |
| Rab GTPases Mark Targets In The Endocytotic Machinery                          |         |           |
|                                                                                | RAB3A   | NP_002857 |
| Platelet Amyloid Precursor Protein Pathway                                     |         |           |
|                                                                                | APP     | NP_958816 |
| Deregulation of CDK5 in Alzheimers Disease                                     |         |           |
|                                                                                | APP     | NP_958816 |
| Role of EGF Receptor Transactivation by GPCRs in Cardiac Hypertrophy           |         |           |
|                                                                                | AGT     | NP_000020 |
| IL 5 Signaling Pathway                                                         |         |           |
|                                                                                | IL1B    | NP_000567 |
| Proteasome Complex                                                             |         |           |
|                                                                                | PSMB6   | NP_002789 |
| Stathmin and breast cancer resistance to antimicrotubule agents                |         |           |
|                                                                                | STMN1   | NP_005554 |
| CDK Regulation of DNA Replication                                              |         |           |
|                                                                                | CDT1    | NP_112190 |
| IL 4 signaling pathway                                                         |         |           |
|                                                                                | IL1B    | NP_000567 |
| Antigen Processing and Presentation                                            |         |           |
|                                                                                | PSMB6   | NP_002789 |
| NFkB activation by Nontypeable Hemophilus influenzae                           |         |           |
|                                                                                | IL1B    | NP_000567 |
| Gamma-aminobutyric Acid Receptor Life Cycle                                    |         |           |
|                                                                                | NSF     | NP_006169 |
| Angiotensin II mediated activation of JNK Pathway via Pyk2 dependent signaling |         |           |
|                                                                                | AGT     | NP_000020 |
| ERassociated degradation (ERAD) Pathway                                        |         |           |
|                                                                                | CANX    | NP_001737 |
| Signal transduction through IL1R                                               |         |           |
|                                                                                | IL1B    | NP_000567 |
|                                                                                |         |           |
| <b>GENMAPP</b>                                                                 |         |           |
| Hs_Glycolysis_and_Gluconeogenesis                                              |         |           |
|                                                                                | ENO2    | NP_001966 |
|                                                                                | HK1     | NP_000179 |
|                                                                                | GPI     | NP_000166 |
| Hs_Acetylcholine_Synthesis                                                     |         |           |
|                                                                                | PCYT1A  | NP_005008 |
| Hs_Glycogen_Metabolism                                                         |         |           |
|                                                                                | PPP2CB  | NP_004147 |
| Hs_Prostaglandin_synthesis_regulation                                          |         |           |
|                                                                                | S100A10 | NP_002957 |
| Hs_Cell_cycle_KEGG                                                             |         |           |
|                                                                                | CALR    | NP_004334 |
|                                                                                | YWHAG   | NP_036611 |
|                                                                                | PRKD1   | NP_002733 |

|                                   |        |           |
|-----------------------------------|--------|-----------|
| Hs_Smooth_muscle_contraction      |        |           |
|                                   | IL1B   | NP_000567 |
|                                   | YWHAG  | NP_036611 |
|                                   | PRKD1  | NP_002733 |
| Hs_Nuclear_Receptors              |        |           |
|                                   | FUS    | NP_004951 |
|                                   | HNRPC  | NP_112604 |
|                                   | SF3A1  | NP_005868 |
| Hs_DNA_replication_Reactome       |        |           |
|                                   | POLE   | NP_006222 |
|                                   | CDT1   | NP_112190 |
| Hs_Circadian_Exercise             |        |           |
|                                   | TUBB3  | NP_006077 |
|                                   | PPP2CB | NP_004147 |
| Hs_GPCRDB_Class_A_Rhodopsin-like  |        |           |
|                                   | RTKN   | NP_149035 |
| Hs_Translation_Factors            |        |           |
|                                   | EEF1A2 | NP_001949 |
| Hs_Ribosomal_Proteins             |        |           |
|                                   | NSF    | NP_006169 |
| Hs_Inflammatory_Response_Pathway  |        |           |
|                                   | COL3A1 | NP_000081 |
| Hs_ACE-Inhibitor_pathway_PharmGKB |        |           |
|                                   | AGT    | NP_000020 |
| Hs_Wnt_signaling                  |        |           |
|                                   | PRKD1  | NP_002733 |
| Hs_Proteasome_Degradation         |        |           |
|                                   | PSMB6  | NP_002789 |
| Hs_G_Protein_Signaling            |        |           |
|                                   | PRKD1  | NP_002733 |
| Hs_S1P_Signaling                  |        |           |
|                                   | SPHK1  | NP_068807 |
| Hs_G1_to_S_cell_cycle_Reactome    |        |           |
|                                   | POLE   | NP_006222 |



Supplemental Table 7. Annotations for network predicted by Ingenuity Pathway Analysis presented in Figure 4.

| Symbol                | Entrez Gene Name                                                                | Entrez Protein ID (human) | Log Ratio (FL/LL) |
|-----------------------|---------------------------------------------------------------------------------|---------------------------|-------------------|
| AAK1                  | AP2 associated kinase 1                                                         |                           |                   |
| ALDOC                 | aldolase C, fructose-bisphosphate                                               | NP_005156                 | -0.24             |
| Androgen-AR           |                                                                                 |                           |                   |
| ANKRA2                | ankyrin repeat, family A (RFXANK-like), 2                                       | NP_075526                 | 0.14              |
| AP2A1                 | adaptor-related protein complex 2, alpha 1 subunit                              |                           |                   |
| AP2B1                 | adaptor-related protein complex 2, beta 1 subunit                               |                           |                   |
| AP2M1                 | adaptor-related protein complex 2, mu 1 subunit                                 | NP_004059                 | -0.24             |
| BID                   | BH3 interacting domain death agonist                                            |                           |                   |
| CAPN1                 | calpain 1, (mu/l) large subunit                                                 |                           |                   |
| CBFA2T3               | core-binding factor, runt domain, alpha subunit 2; translocated to, 3           | NP_005178                 | 0.22              |
| CBS                   | cystathionine-beta-synthase                                                     | NP_000062                 | 0.16              |
| CLINT1                | clathrin interactor 1                                                           |                           |                   |
| Creb                  |                                                                                 |                           |                   |
| DLG4                  | discs, large homolog 4 (Drosophila)                                             |                           |                   |
| DPYSL2                | dihydropyrimidinase-like 2                                                      | NP_001377                 | -1.00             |
| EDF1                  | endothelial differentiation-related factor 1                                    | NP_003783                 | -0.36             |
| ENO2                  | enolase 2 (gamma, neuronal)                                                     | NP_001966                 | -0.64             |
| ENSA                  | endosulfine alpha                                                               |                           |                   |
| EPN2                  | epsin 2                                                                         |                           |                   |
| EPS15                 | epidermal growth factor receptor pathway substrate 15                           |                           |                   |
| FXYD5                 | FXYD domain containing ion transport regulator 5                                | NP_054883                 | 0.20              |
| GCC1                  | GRIP and coiled-coil domain containing 1                                        | NP_078799                 | -0.11             |
| GPI                   | glucose phosphate isomerase                                                     | NP_000166                 | -0.54             |
| Gsk3                  |                                                                                 |                           |                   |
| HISTONE               |                                                                                 |                           |                   |
| HK1                   | hexokinase 1                                                                    | NP_000179                 | -0.54             |
| Hsp70                 |                                                                                 |                           |                   |
| HTT                   | huntingtin                                                                      |                           |                   |
| IL12                  |                                                                                 |                           |                   |
| Insulin               |                                                                                 |                           |                   |
| Interferon alpha      |                                                                                 |                           |                   |
| IRF5                  | interferon regulatory factor 5                                                  | NP_002191                 | 0.31              |
| L-glutamic acid       |                                                                                 |                           |                   |
| LSAMP                 | limbic system-associated membrane protein                                       | NP_002329                 | 0.08              |
| MARCO                 | macrophage receptor with collagenous structure                                  | NP_006761                 | 0.17              |
| MCRS1                 | microspherule protein 1                                                         | NP_006328                 | 0.25              |
| MEA1                  | male-enhanced antigen 1                                                         | NP_055438                 | 0.19              |
| MEN1                  | multiple endocrine neoplasia I                                                  | NP_570711                 | -0.57             |
| MYBPC2                | myosin binding protein C, fast type                                             |                           |                   |
| NAPB                  | N-ethylmaleimide-sensitive factor attachment protein, beta                      | NP_071363                 | -0.60             |
| NLGN3                 | neuroigin 3                                                                     | NP_061850                 | 0.19              |
| NMNAT1                | nicotinamide nucleotide adenyltransferase 1                                     | NP_073624                 | 0.29              |
| PACS2                 | phosphofurin acidic cluster sorting protein 2                                   | NP_056012                 | 0.10              |
| PDGF BB               |                                                                                 |                           |                   |
| Phosphocreatine       |                                                                                 |                           |                   |
| Pka                   |                                                                                 |                           |                   |
| Pka catalytic subunit |                                                                                 |                           |                   |
| Pkc(s)                |                                                                                 |                           |                   |
| Proteasome            |                                                                                 |                           |                   |
| PTRF                  | polymerase I and transcript release factor                                      | NP_036364                 | -0.48             |
| RNF213                | ring finger protein 213                                                         | NP_065965                 | 0.43              |
| SDH                   |                                                                                 |                           |                   |
| SDHB                  | succinate dehydrogenase complex, subunit B, iron sulfur (lp)                    | NP_002991                 | -0.20             |
| SET                   | SET nuclear oncogene                                                            | NP_003002                 | -0.46             |
| SGIP1                 | SH3-domain GRB2-like (endophilin) interacting protein 1                         | NP_115667                 | -0.79             |
| SLBP                  | stem-loop binding protein                                                       | NP_006518                 | 0.23              |
| SLC1A3                | solute carrier family 1 (glial high affinity glutamate transporter), member 3   |                           |                   |
| SLC25A1               | solute carrier family 25 (mitochondrial carrier; citrate transporter), member 1 | NP_005975                 | 0.13              |
| SLC25A22              | solute carrier family 25 (mitochondrial carrier: glutamate), member 22          |                           |                   |
| SLC25A3               | solute carrier family 25 (mitochondrial carrier; phosphate carrier), member 3   | NP_002626                 | -0.36             |
| ST3GAL2               | ST3 beta-galactoside alpha-2,3-sialyltransferase 2                              | NP_008858                 | 0.19              |
| STON1-GTF2A1L         | STON1-GTF2A1L readthrough transcript                                            |                           |                   |
| STON2                 | stonin 2                                                                        |                           |                   |
| SYN2                  | synapsin II                                                                     | NP_003169                 | -0.52             |
| TAS1R1                | taste receptor, type 1, member 1                                                | NP_803883                 | 0.27              |
| TAS1R3                | taste receptor, type 1, member 3                                                |                           |                   |
| TRIM37                | tripartite motif-containing 37                                                  | NP_056109                 | -0.26             |
| TRIOBP                | TRIO and F-actin binding protein                                                | NP_008963                 | 0.13              |
| UFSP2                 | UFM1-specific peptidase 2                                                       | NP_060829                 | 0.34              |
| VAPB                  | VAMP (vesicle-associated membrane protein)-associated protein B and C           | NP_004729                 | -0.28             |

Supplemental Table 8. Genes identified in the microarray with related genes in knockout or transgenic mice leading to obesity.

| <b>Clone ID</b> | <b>GenBank Accession #</b> | <b>Microarray Gene (chicken)</b>                                  | <b>Microarray Expression (chicken)</b> | <b>Knockout/ Transgenic Gene (mouse)</b> | <b>Phenotype (mouse)</b> |
|-----------------|----------------------------|-------------------------------------------------------------------|----------------------------------------|------------------------------------------|--------------------------|
| pgf2n.pk006.k5  | BM427410                   | Transmembrane protein induced by TNF $\alpha$ ( <i>TMEM120A</i> ) | FL $\uparrow$                          | TNF $\alpha$ over-expression             | obese                    |
| pgp2n.pk004.a23 | BM490642                   | GHRH-Receptor ( <i>GHRH-R</i> )                                   | LL $\downarrow$                        | GHRH knockout                            | obese                    |
| pgf1n.pk010.k1  | BI067093                   | Metallo-peptidase 1 ( <i>PITRMI</i> )                             | LL $\downarrow$                        | ADAMS TS knockout                        | lean                     |
| pgr1n.pk006.19  | CD218118                   | CEBP zeta ( <i>CEBPZ</i> )                                        | LL $\downarrow$                        | CEBP alpha knockout                      | lean                     |

Supplemental Table 9. Marker analysis for similarities in gene expression profiles of selected genes. Expression profiles for genes denoted in bold were confirmed by qRT-PCR.

**Marker selection analysis for Neural Enolase**

| Gene Name                                    | Spot  | Score |
|----------------------------------------------|-------|-------|
| <b>Neural enolase</b>                        | 13011 | 0     |
| malignant liposarcoma                        | 6875  | 0.01  |
| klotho secreted isoform                      | 3653  | 0.02  |
| PP2A-alpha                                   | 3986  | 0.02  |
| ACTIN, CYTOPLASMIC TYPE 5                    | 4161  | 0.02  |
| No Hits Found_20                             | 15371 | 0.02  |
| Sodium pump 3_1                              | 2045  | 0.02  |
| RNA-binding protein FUS                      | 16410 | 0.03  |
| beta-amyloid precursor                       | 3906  | 0.03  |
| eukaryotic translation elongation factor 1_1 | 16106 | 0.03  |
| Regulatory protein TSC-22                    | 5214  | 0.03  |
| unnamed protein product                      | 3853  | 0.03  |
| synapsin Iib                                 | 14818 | 0.03  |
| EST H08032.1                                 | 13326 | 0.03  |
| tubulin, beta 5                              | 2954  | 0.03  |
| Unknown protein_3                            | 17661 | 0.03  |
| endocrine neoplasia 1                        | 12899 | 0.03  |
| vesicle associated protein                   | 5128  | 0.03  |
| No Hits Found_116                            | 14562 | 0.04  |
| No Hits Found_56                             | 12987 | 0.04  |
| transcription elongation factor B            | 1676  | 0.04  |
| PQBP-1b/c                                    | 3258  | 0.04  |
| <b>similar to phosphoglycerate mutase</b>    | 6482  | 0.04  |
| tubulin, beta                                | 9603  | 0.05  |
| ADAM 12                                      | 17139 | 0.05  |
| POL-like                                     | 15506 | 0.05  |
| <b>phosphoglucose isomerase</b>              | 73    | 0.05  |
| tetraspan 3                                  | 17122 | 0.05  |
| No Hits Found_68                             | 7604  | 0.05  |
| beta-amyloid precursor                       | 9607  | 0.05  |
| Amyloid-like protein 2                       | 12582 | 0.05  |
| <b>Dihydropyrimidinase related protein-2</b> | 12821 | 0.05  |
| alpha 1 type III collagen                    | 5511  | 0.06  |
| similar to hypothetical protein_1            | 8410  | 0.06  |
| gamma-synergin                               | 14853 | 0.06  |
| No Hits Found_47                             | 5021  | 0.06  |
| <b>hexokinase1</b>                           | 10230 | 0.06  |
| retinoblastoma tumor suppressor              | 9201  | 0.06  |
| ubiquitin-like 3                             | 18010 | 0.06  |
| SNARE                                        | 10056 | 0.06  |
| similar to Amyloid beta A4                   | 1900  | 0.06  |
| serum deprivation response protein           | 13473 | 0.06  |
| unnamed protein product_6                    | 16147 | 0.07  |
| vesicular fusion protein NSF                 | 9664  | 0.07  |
| SET protein                                  | 11620 | 0.07  |
| KIAA0605 gene product                        | 13929 | 0.07  |
| Similar to macropain                         | 13235 | 0.07  |
| Sodium pump 3                                | 8105  | 0.07  |
| fusion protein attachment protein            | 8244  | 0.07  |
| Fas-ligand associated factor 3               | 7452  | 0.07  |

**Marker selection analysis for hexokinase 1**

| Gene Name                                    | Spot  | Score |
|----------------------------------------------|-------|-------|
| <b>hexokinase1</b>                           | 10230 | 0     |
| gamma-synergin                               | 14853 | 0.01  |
| beta-amyloid precursor                       | 3906  | 0.02  |
| Ubiquitin thiolesterase 1                    | 13281 | 0.02  |
| NDRG                                         | 4966  | 0.02  |
| vesicular fusion protein NSF                 | 9664  | 0.02  |
| <b>Dihydropyrimidinase related protein-2</b> | 12821 | 0.02  |
| No Hits Found_20                             | 15371 | 0.03  |
| adenosinetriphosphatase                      | 13232 | 0.03  |
| valosin-containing protein                   | 1746  | 0.03  |
| tubulin, beta 5                              | 2954  | 0.03  |
| LEP100 protein                               | 14458 | 0.03  |
| ubiquitin-like 3                             | 18010 | 0.04  |
| ERO1-like                                    | 9129  | 0.04  |
| nuclear ribonucleoprotein L                  | 11670 | 0.04  |
| EGF-response factor 2                        | 16446 | 0.04  |
| SNAP-beta                                    | 16210 | 0.04  |
| Sodium pump 3_1                              | 2045  | 0.05  |
| klotho secreted isoform                      | 3653  | 0.05  |
| Dynactin                                     | 16239 | 0.05  |
| unnamed protein product_17                   | 6569  | 0.05  |
| synapsin Iib                                 | 14818 | 0.05  |
| phosphate carrier protein                    | 12265 | 0.06  |
| unnamed protein product_6                    | 16147 | 0.06  |
| transcription elongation factor B            | 1676  | 0.06  |
| <b>Neural enolase</b>                        | 13011 | 0.06  |
| Unknown protein_5                            | 1831  | 0.06  |
| retinoblastoma tumor suppressor              | 9201  | 0.06  |
| <b>phosphoglucose isomerase</b>              | 73    | 0.07  |
| Similar to macropain                         | 13235 | 0.07  |
| nuclear distribution gene C                  | 17031 | 0.07  |
| QkI-2                                        | 16051 | 0.07  |
| Selenophosphate synthetase 2                 | 13258 | 0.07  |
| unnamed protein product                      | 3853  | 0.07  |
| sphingosine kinase 1                         | 3703  | 0.07  |
| ACTIN, CYTOPLASMIC TYPE 5                    | 4161  | 0.07  |
| unnamed protein product_12                   | 2170  | 0.07  |
| POL-like                                     | 15506 | 0.07  |
| unnamed protein product                      | 15622 | 0.07  |
| endocrine neoplasia 1                        | 12899 | 0.08  |
| ankyrin repeat and SOCS box protein          | 14767 | 0.08  |
| Sodium pump 3                                | 8105  | 0.08  |
| SET protein                                  | 11620 | 0.08  |
| KIAA0605 gene product                        | 13929 | 0.08  |
| EST H08032.1                                 | 13326 | 0.08  |
| tetraspan 3                                  | 17122 | 0.08  |
| malignant liposarcoma                        | 6875  | 0.08  |
| <b>similar to phosphoglycerate mutase</b>    | 6482  | 0.09  |
| No Hits Found_68                             | 7604  | 0.09  |
| similar to Eferin                            | 15094 | 0.09  |

**Marker selection analysis for phosphoglucose isomerase**

| Gene Name                                    | Spot  | Score |
|----------------------------------------------|-------|-------|
| <b>phosphoglucose isomerase</b>              | 73    | 0     |
| tetraspan 3                                  | 17122 | 0.01  |
| retinoblastoma tumor suppressor              | 9201  | 0.02  |
| ACTIN, CYTOPLASMIC TYPE 5                    | 4161  | 0.02  |
| nuclear distribution gene C                  | 17031 | 0.02  |
| endocrine neoplasia 1                        | 12899 | 0.02  |
| ADAM 12                                      | 17139 | 0.02  |
| tubulin, beta 5                              | 2954  | 0.03  |
| Similar to macropain                         | 13235 | 0.03  |
| unnamed protein product                      | 3853  | 0.03  |
| LEP100 protein                               | 14458 | 0.04  |
| beta-amyloid precursor                       | 3906  | 0.04  |
| ubiquitin-like 3                             | 18010 | 0.04  |
| No Hits Found_116                            | 14562 | 0.04  |
| eukaryotic translation elongation factor 1_1 | 16106 | 0.05  |
| ERO1-like                                    | 9129  | 0.05  |
| POL-like                                     | 15506 | 0.05  |
| <b>Neural enolase</b>                        | 13011 | 0.05  |
| EST H08032.1                                 | 13326 | 0.05  |
| vesicle associated protein                   | 5128  | 0.05  |
| Similar to hypothetical protein              | 14095 | 0.05  |
| <b>Dihydropyrimidinase related protein-2</b> | 12821 | 0.05  |
| tubulin, beta                                | 9603  | 0.05  |
| KIAA0605 gene product                        | 13929 | 0.05  |
| malignant liposarcoma                        | 6875  | 0.06  |
| synapsin Iib                                 | 14818 | 0.06  |
| vesicular fusion protein NSF                 | 9664  | 0.06  |
| adenosinetriphosphatase                      | 13232 | 0.06  |
| <b>hexokinase1</b>                           | 10230 | 0.07  |
| gamma-synergin                               | 14853 | 0.07  |
| Ubiquitin thiolesterase 1                    | 13281 | 0.07  |
| unnamed protein product_13                   | 2687  | 0.07  |
| similar to Eferin                            | 15094 | 0.07  |
| pre-mRNA splicing factor_1                   | 14854 | 0.07  |
| unnamed protein product_17                   | 6569  | 0.07  |
| No Hits Found_20                             | 15371 | 0.07  |
| Piccolo protein                              | 6717  | 0.07  |
| ankyrin 2                                    | 17734 | 0.07  |
| nuclear transcription factor Y               | 4189  | 0.08  |
| chaperonin containing TCP-1                  | 17165 | 0.08  |
| T-cell lymphoma tumor antigen                | 9876  | 0.08  |
| QkI-2                                        | 16051 | 0.08  |
| No Hits Found_71                             | 6082  | 0.08  |
| Regulatory protein TSC-22                    | 5214  | 0.08  |
| HSCO protein                                 | 12939 | 0.08  |
| pre-mRNA splicing factor_2                   | 14844 | 0.08  |
| Selenophosphate synthetase 2                 | 13258 | 0.08  |
| Sodium pump 3_1                              | 2045  | 0.09  |
| klotho secreted isoform                      | 3653  | 0.09  |
| unnamed protein product                      | 15622 | 0.09  |

---

**Marker selection analysis for phosphoglycerate mutase**

| Gene Name                                    | Spot  | Score |
|----------------------------------------------|-------|-------|
| <b>phosphoglycerate mutase</b>               | 6482  | 0     |
| Sodium pump 3_1                              | 2045  | 0.02  |
| Sodium pump 3                                | 8105  | 0.02  |
| Amyloid-like protein 2                       | 12582 | 0.03  |
| SNARE                                        | 10056 | 0.03  |
| transcription elongation factor B            | 1676  | 0.03  |
| beta-amyloid precursor                       | 9607  | 0.03  |
| eukaryotic translation elongation factor 1_1 | 16106 | 0.04  |
| Sodium pump 3_2                              | 11249 | 0.04  |
| klotho secreted isoform                      | 3653  | 0.04  |
| eukaryotic translation elongation factor 1   | 16149 | 0.04  |
| fusion protein attachment protein            | 8244  | 0.04  |
| pre-mRNA splicing factor                     | 9696  | 0.04  |
| <b>Neural enolase</b>                        | 13011 | 0.04  |
| Regulatory protein TSC-22                    | 5214  | 0.05  |
| alpha 1 type III collagen                    | 5511  | 0.05  |
| similar to Amyloid beta A4                   | 1900  | 0.05  |
| No Hits Found_128                            | 4568  | 0.05  |
| hypothetical protein_8                       | 487   | 0.06  |
| RNA-binding protein FUS                      | 16410 | 0.06  |
| extensin                                     | 17131 | 0.06  |
| PP2A-alpha                                   | 3986  | 0.06  |
| pre-mRNA splicing factor_2                   | 14844 | 0.06  |
| unnamed protein product                      | 3853  | 0.06  |
| No Hits Found_56                             | 12987 | 0.06  |
| Na/K ATPase_1                                | 2049  | 0.06  |
| beta-amyloid precursor                       | 3906  | 0.07  |
| calmodulin 2                                 | 14543 | 0.07  |
| Similar to protein kinase C                  | 6549  | 0.07  |
| No Hits Found_20                             | 15371 | 0.07  |
| F-box only protein 3                         | 1309  | 0.07  |
| VAMP                                         | 8081  | 0.07  |
| Unknown protein                              | 14486 | 0.08  |
| poly(A) binding protein                      | 1670  | 0.08  |
| ADAM 12                                      | 17139 | 0.08  |
| ACTIN, CYTOPLASMIC TYPE 5                    | 4161  | 0.08  |
| EST H08032.1                                 | 13326 | 0.08  |
| No Hits Found_68                             | 7604  | 0.08  |
| vesicle associated protein                   | 5128  | 0.08  |
| adenosinetriphosphatase                      | 13232 | 0.08  |
| malignant liposarcoma                        | 6875  | 0.08  |
| Na/K ATPase_3                                | 4949  | 0.08  |
| endocrine neoplasia 1                        | 12899 | 0.08  |
| <b>hexokinase1</b>                           | 10230 | 0.09  |
| agCP3452                                     | 8686  | 0.09  |
| synapsin Iib                                 | 14818 | 0.09  |
| Na/K ATPase                                  | 1902  | 0.09  |
| Pleiotrophin                                 | 8479  | 0.09  |
| Unknown gene product                         | 17829 | 0.09  |
| phosphate carrier protein                    | 12265 | 0.09  |

---

**Marker selection analysis for Isocitrate Dehydrogenase**

| Gene Name                        | Spot  | Score |
|----------------------------------|-------|-------|
| <b>Isocitrate dehydrogenase</b>  | 16230 | 0     |
| Putative protein C21orf45        | 346   | 0.03  |
| visinin-like 1                   | 11435 | 0.04  |
| No Hits Found_67                 | 14042 | 0.04  |
| unnamed protein product_9        | 5958  | 0.05  |
| poly(A) binding protein          | 1670  | 0.05  |
| eukaryotic initiation factor 5   | 11520 | 0.05  |
| No Hits Found_130                | 16172 | 0.05  |
| similar to LPS-responsive        | 11025 | 0.05  |
| No Hits Found_5                  | 17423 | 0.05  |
| RIKEN cDNA 1110066L09            | 17279 | 0.05  |
| serine incorporator 1            | 9694  | 0.05  |
| ATP synthase alpha subunit_1     | 8133  | 0.06  |
| DEAH box isoform                 | 2736  | 0.06  |
| No Hits Found_84                 | 4336  | 0.06  |
| ATP synthase alpha subunit       | 13508 | 0.06  |
| prenyl protein protease          | 9139  | 0.06  |
| NEURONAL PROTEIN 3.1             | 4912  | 0.06  |
| HSPC288                          | 13041 | 0.06  |
| GAPDH                            | 14661 | 0.07  |
| deoxyhypusine synthase           | 16197 | 0.07  |
| similar to RALY                  | 1194  | 0.07  |
| trypsin domain containing 1      | 10806 | 0.07  |
| No Hits Found_34                 | 2861  | 0.07  |
| vesicle associated protein       | 5128  | 0.07  |
| agCP3452                         | 8686  | 0.08  |
| hnRNPC related                   | 6730  | 0.08  |
| Lipid Transfer ProteinII         | 12459 | 0.08  |
| unnamed protein product_1        | 4379  | 0.08  |
| RIKEN cDNA_1                     | 7775  | 0.08  |
| similar to GS15                  | 7790  | 0.08  |
| No Hits Found_25                 | 7453  | 0.08  |
| mitochondrial ribosomal prtn S23 | 17989 | 0.09  |
| No Hits Found_116                | 14562 | 0.09  |
| No Hits Found_15                 | 11568 | 0.09  |
| ankyrin 2                        | 17734 | 0.09  |
| Nesprin-2                        | 843   | 0.09  |
| pre-mRNA splicing factor_2       | 14844 | 0.09  |
| extensin                         | 17131 | 0.09  |
| Alpha1,2-Mannosidase             | 13854 | 0.09  |

**Marker selection analysis for Aldolase C**

| Gene Name                              | Spot  | Score |
|----------------------------------------|-------|-------|
| <b>aldolase C</b>                      | 3836  | 0     |
| PHLDB2                                 | 1283  | 0.07  |
| NADP-specific isocitrate dehydrogenase | 5860  | 0.07  |
| unnamed protein product_4              | 15664 | 0.07  |
| vesicle-associated membrane protein 3  | 1740  | 0.07  |
| neurofilament-L                        | 4896  | 0.09  |
| Thy-1 antigen                          | 5098  | 0.09  |
| elongation factor 1-beta               | 2131  | 0.09  |

**Marker selection analysis for Induced by TNF alpha (TNF AP)**

| Gene Name                                      | Spot  | Score |
|------------------------------------------------|-------|-------|
| <b>induced by tumor necrosis factor alpha</b>  | 10372 | 0     |
| c-src tyrosine kinase                          | 10037 | 0.03  |
| SPT3-associated factor                         | 2884  | 0.03  |
| similar to exocyst complex component 3         | 6894  | 0.03  |
| splicing factor 3a                             | 10344 | 0.04  |
| No Hits Found_60                               | 1724  | 0.04  |
| Ribonuclease CL2                               | 13900 | 0.04  |
| GATA-2                                         | 5044  | 0.05  |
| LIM-domain protein CRP1                        | 13465 | 0.05  |
| disintegrin-like and metalloprotease domain    | 4482  | 0.05  |
| IGF-binding protein 2                          | 3240  | 0.05  |
| Tropomyosin 1 alpha chain                      | 17149 | 0.05  |
| eukaryotic translation initiation factor 3, s6 | 628   | 0.05  |
| Similar to CGI-67 protein                      | 14406 | 0.05  |
| FLJ22611-like protein                          | 3250  | 0.05  |
| vesicle-associated membrane protein            | 16240 | 0.05  |
| No Hits Found_33                               | 10679 | 0.05  |
| nucleotide pyrophosphatase 3                   | 593   | 0.06  |
| type V procollagen alpha                       | 4453  | 0.06  |
| Unknown protein_1                              | 3921  | 0.06  |
| Rho GTPase activating protein 26               | 11565 | 0.06  |
| TROPONIN I                                     | 2751  | 0.06  |
| FLJ00315 protein                               | 17077 | 0.06  |
| muscle specific gene                           | 8010  | 0.06  |
| hypothetical protein_3                         | 10193 | 0.06  |
| origin recognition complex                     | 2327  | 0.06  |
| polymerase II polypeptide C                    | 2825  | 0.07  |
| No Hits Found_7                                | 4878  | 0.07  |
| glucokinase                                    | 1753  | 0.07  |
| hypothetical protein FLJ11200                  | 15682 | 0.07  |
| heat shock protein 40                          | 17417 | 0.07  |
| Tcf-3 co-repressor CtBP                        | 161   | 0.07  |
| phosphatidylinositol transfer protein          | 9927  | 0.07  |
| RB1-inducible coiled-coil 1                    | 7105  | 0.08  |
| Ferredoxin-NADP(+)reductase                    | 1322  | 0.08  |
| PTEN induced putative kinase 1                 | 15035 | 0.08  |
| NADH dehydrogenase flavoprotein 1              | 5452  | 0.08  |
| Collagen alpha 1                               | 5378  | 0.08  |
| chloride channel 7                             | 530   | 0.08  |
| Creatine kinase                                | 15098 | 0.08  |
| Arp23                                          | 9681  | 0.08  |
| ATP synthase beta chain                        | 1743  | 0.08  |
| coronin, actin binding protein, 2B             | 14087 | 0.09  |
| eukaryotic translation elongation factor 1_2   | 15734 | 0.09  |
| BLOCK 25                                       | 7848  | 0.09  |
| hypothetical protein                           | 16484 | 0.09  |
| Apolipoprotein A-I                             | 12316 | 0.09  |
| Calpactin I light chain                        | 2210  | 0.09  |
| No Hits Found_72                               | 1662  | 0.09  |
| ATP/GTP-binding protein                        | 8012  | 0.09  |

---



## Marker selection analysis for TNF receptor associated factor 1

| Gene Name                                  | Spot  | Score |
|--------------------------------------------|-------|-------|
| <b>tumor necrosis factor type 1</b>        | 15016 | 0     |
| MAP kinase phosphatase-1                   | 14632 | 0     |
| preprocarboxypeptidase A                   | 2215  | 0.01  |
| protein tyrosine phosphatase               | 1679  | 0.01  |
| No Hits Found_49                           | 5980  | 0.02  |
| immunoglobulin-like receptor               | 5532  | 0.02  |
| ezrin                                      | 17732 | 0.02  |
| UDP-glucuronosyltransferase 1A9            | 9610  | 0.02  |
| similar to Heat shock protein HSP 90-alpha | 5677  | 0.02  |
| Sk-tropomodulin                            | 13748 | 0.02  |
| Unknown protein_4                          | 2775  | 0.02  |
| <b>Tryptophan 5-monoxygenase</b>           | 7185  | 0.03  |
| Cytochrome P450                            | 17362 | 0.03  |
| KIAA0232 protein                           | 8499  | 0.03  |
| chromosome 20 open reading frame 149       | 13481 | 0.03  |
| No Hits Found_99                           | 4689  | 0.03  |
| ankyrin repeat                             | 5336  | 0.03  |
| acid alpha glucosidase                     | 12981 | 0.03  |
| No Hits Found_85                           | 15679 | 0.03  |
| Peroxisomal coenzyme A diphosphatase       | 4869  | 0.03  |
| No Hits Found_80                           | 11711 | 0.04  |
| vacuolar protein sorting 4 homolog B       | 498   | 0.04  |
| Similar to LIM domains                     | 16825 | 0.04  |
| Serum albumin precursor                    | 13896 | 0.04  |
| similar to Np95-like ring finger protein   | 10599 | 0.04  |
| Acylphosphatasephosphohydrolase            | 14313 | 0.04  |
| hypothetical protein MGC38361              | 13731 | 0.04  |
| No Hits Found_58                           | 16838 | 0.04  |
| No Hits Found_88                           | 14208 | 0.04  |
| aldo-keto reductase                        | 2889  | 0.04  |
| mitochondrial ribosomal protein S25        | 2875  | 0.04  |
| Unknown protein_3                          | 2888  | 0.04  |
| <b>putative sweet taste receptor T1R1</b>  | 17155 | 0.04  |
| No Hits Found_129                          | 9825  | 0.04  |
| hypothetical protein_3                     | 12224 | 0.04  |
| No Hits Found_3                            | 10789 | 0.05  |
| LAP                                        | 12407 | 0.05  |
| No Hits Found_64                           | 17248 | 0.05  |
| ribosome-binding protein                   | 14626 | 0.05  |
| No Hits Found_46                           | 16241 | 0.05  |
| cytochrome P450 (CYP27A1)                  | 5763  | 0.05  |
| No Hits Found_29                           | 12453 | 0.05  |
| Creatine kinase                            | 15098 | 0.05  |
| target of Jun 3                            | 474   | 0.05  |
| No Hits Found_6                            | 10653 | 0.05  |
| No Hits Found_54                           | 15755 | 0.05  |
| No Hits Found_31                           | 12392 | 0.06  |
| <b>GHRH receptor</b>                       | 11448 | 0.06  |
| Ig gamma chain                             | 11778 | 0.06  |
| AI182287                                   | 7560  | 0.06  |

---

**Marker selection analysis for CEBPζ**

| Gene Name                                      | Spot  | Score |
|------------------------------------------------|-------|-------|
| <b>CEBPζ</b>                                   | 19069 | 0     |
| RB1-inducible coiled-coil 1                    | 7105  | 0.05  |
| ATP synthase beta chain                        | 1743  | 0.05  |
| KIAA1892 protein                               | 4417  | 0.05  |
| NADH dehydrogenase flavoprotein 1              | 5452  | 0.06  |
| RIKEN cDNA_4                                   | 3763  | 0.06  |
| IQ motif containing K (IQCK)                   | 244   | 0.07  |
| heat shock protein 40                          | 17417 | 0.07  |
| N-deacetylase/N-sulfotransferase               | 10917 | 0.07  |
| Unknown protein_5                              | 357   | 0.07  |
| CREATINE KINASE                                | 15098 | 0.08  |
| disintegrin-like and metalloprotease domain    | 4482  | 0.08  |
| polymerase II polypeptide C                    | 2825  | 0.09  |
| Ferredoxin-NADP(+)reductase\                   | 1322  | 0.09  |
| interleukin enhancer binding factor 2          | 9723  | 0.09  |
| Tropomyosin 1 alpha chain                      | 17149 | 0.09  |
| Unknown protein_1                              | 3921  | 0.09  |
| eukaryotic translation initiation factor 3, s6 | 628   | 0.1   |
| mitochondrial ribosomal protein S25            | 2875  | 0.1   |
| No Hits Found_86                               | 4050  | 0.1   |
| chloride channel 7                             | 530   | 0.1   |
| origin recognition complex                     | 2327  | 0.1   |
| Unknown protein_3                              | 2888  | 0.11  |
| phosphatidylinositol transfer protein          | 9927  | 0.11  |
| No Hits Found_54                               | 15755 | 0.11  |
| <b>induced by tumor necrosis factor alpha</b>  | 10372 | 0.12  |
| No Hits Found_85                               | 15679 | 0.12  |
| ADP-ribosylation-like factor 6                 | 13499 | 0.12  |
| <b>Tryptophan 5-monooxygenase</b>              | 7185  | 0.12  |

---
